# Supplementary material for: Multi-catalysis cascade reactions based on the methoxycarbonylketene platform: diversity-oriented synthesis of functionalized non-symmetrical malonates for agrochemicals and pharmaceuticals
Source: Royal Society of Chemistry journal article supplement (doi:10.1039/b901652j), 2009-01-01

## Supporting Information-I

# **Multi-catalysis cascade reactions based on the methoxycarbonylketene platform: diversity-oriented synthesis of functionalized non-symmetrical malonates for agrochemicals and pharmaceuticals**

**Dhevalapally B. Ramachary,\* Chintalapudi Venkaiah,  
Y. Vijayendar Reddy, and Mamillapalli Kishor**

*School of Chemistry, University of Hyderabad, Central University (P.O.),  
Hyderabad 500 046, India  
[ramsc@uohyd.ernet.in](mailto:ramsc@uohyd.ernet.in)*

| <b>CONTENTS</b>                              | <b>Page No.</b> |
|----------------------------------------------|-----------------|
| 1. General Methods                           | S2              |
| 2. General Procedure                         | S2-S3           |
| 3. Spectral Data                             | S3-S27          |
| 4. Crystal Structure for <b>18ea</b>         | S28             |
| 5. Crystal Structure Information <b>18ea</b> | S29-30          |

**General Methods:** The  $^1\text{H}$  NMR and  $^{13}\text{C}$  NMR spectra were recorded at 400 MHz and 100 MHz, respectively. The chemical shifts are reported in ppm downfield to TMS ( $\delta = 0$ ) for  $^1\text{H}$  NMR and relative to the central  $\text{CDCl}_3$  resonance ( $\delta = 77.0$ ) for  $^{13}\text{C}$  NMR. *In the  $^{13}\text{C}$  NMR spectra, the nature of the carbons (C, CH,  $\text{CH}_2$  or  $\text{CH}_3$ ) was determined by recording the DEPT-135 experiment, and is given in parentheses.* The coupling constants  $J$  are given in Hz. Column chromatography was performed using Acme's silica gel (particle size 0.063-0.200 mm). High-resolution mass spectra were recorded on micromass ESI-TOF MS. GCMS mass spectrometry was performed on Shimadzu GCMS-QP2010 mass spectrometer. IR spectra were recorded on JASCO FT/IR-5300 and Thermo Nicolet FT/IR-5700. Elemental analyses were recorded on a Thermo Finnigan Flash EA 1112 analyzer. Mass spectra were recorded on either VG7070H mass spectrometer using EI technique or Shimadzu-LCMS-2010 A mass spectrometer. The X-ray diffraction measurements were carried out at 298 K on an automated Enraf-Nonious MACH 3 diffractometer using graphite monochromated, Mo-K $\alpha$  ( $\lambda = 0.71073 \text{ \AA}$ ) radiation with CAD4 software or the X-ray intensity data were measured at 298 K on a Bruker SMART APEX CCD area detector system equipped with a graphite monochromator and a Mo-K $\alpha$  fine-focus sealed tube ( $\lambda = 0.71073 \text{ \AA}$ ). For thin-layer chromatography (TLC), silica gel plates Merck 60 F254 were used and compounds were visualized by irradiation with UV light and/or by treatment with a solution of *p*-anisaldehyde (23 mL), conc.  $\text{H}_2\text{SO}_4$  (35 mL), acetic acid (10 mL), and ethanol (900 mL) followed by heating.

**Materials:** All solvents and commercially available chemicals were used as received.

### **General Experimental Procedures for the Multi-catalysis Cascade Reactions:**

**Proline-catalyzed cascade O/H/A/K/E reactions in one-pot:** In an ordinary glass vial equipped with a magnetic stirring bar, to 0.5 mmol of the aldehyde/ketone **3**, 0.5 mmol of CH-acid **1** and 0.5 mmol of Hantzsch ester **2** was added 1.7 mL of solvent, and then the catalyst amino acid **4** (0.1 mmol) was added and the reaction mixture was stirred at 25 °C for the time indicated in Tables 1, 2 and 3. To the crude reaction mixture added 15

equivalents of an ethereal solution of diazomethane and the reaction mixture was stirred at room temperature for the time indicated in Tables 1, 2 and 3. After evaporation of the solvent and excess diazomethane completely in fume hood, the crude reaction mixture was directly loaded onto a silica gel column with or without aqueous work-up and pure one-pot products **13** were obtained by column chromatography (silica gel, mixture of hexane/ethyl acetate).

**Proline/HMPT-catalyzed O/H/A/K/E/A reactions in one-pot:** In an ordinary glass vial equipped with a magnetic stirring bar, to 0.5 mmol of the aldehyde/ketone **3**, 0.5 mmol of CH-acid **1** and 0.5 mmol of Hantzsch ester **2** was added 1.7 mL of solvent, and then the catalyst amino acid **4** (0.1 mmol) was added and the reaction mixture was stirred at 25 °C for the time indicated in Tables 1, 2 and 3. To the crude reaction mixture added 15 equivalents of an ethereal solution of diazomethane and the reaction mixture was stirred at room temperature for the time indicated in Tables 1, 2 and 3. After evaporation of the solvent and excess diazomethane completely in fume hood, to the crude reaction mixture was added active olefins/acetylenes **14a-d**, hexamethylphosphorous triamide (HMPT) **15** (10 mol%) and CH<sub>3</sub>CN (1.0 mL) and stirred at 25 °C for 0.5 h. The crude reaction mixture was directly loaded onto a silica gel column with or without aqueous work-up and pure one-pot products **16** were obtained by column chromatography (silica gel, mixture of hexane/ethyl acetate).

**Cinchonidine-Thiourea-catalyzed Alkylation Reactions:** In an ordinary glass vial equipped with a magnetic stirring bar, to 0.2 mmol of the ethyl methyl 2-benzyl-malonate **13aa** and 0.4 mmol of β-nitrostyrene **14e** was added 1.0 mL of DCM solvent, and then the catalysts cinchonidine (0.04 mmol) and thiourea (0.04 mmol) was added and the reaction mixture was stirred at 25 °C for the 96 h. The crude reaction mixture was directly loaded onto a silica gel column with or without aqueous work-up and pure product **16aae** was obtained by column chromatography (silica gel, mixture of hexane/ethyl acetate).

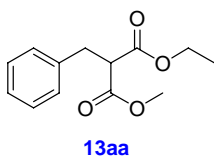

**Benzyl-malonic acid ethyl ester methyl ester (13aa):** Purified by column chromatography using EtOAc/hexane and isolated as oil. IR (neat):  $\nu_{\max}$  2986, 1736 (O-C=O), 1731 (O-C=O), 1275, 1230, 1151,

753 and 699 $\text{cm}^{-1}$ ;  $^1\text{H}$  NMR ( $\text{CDCl}_3$ )  $\delta$  7.30–7.19 (5H, m) [Ar-*H*]; 4.15 (2H, q,  $J$  = 8.0 Hz,  $\text{OCH}_2\text{CH}_3$ ), 3.70 (3H, s,  $\text{OCH}_3$ ), 3.66 (1H, t,  $J$  = 8.0 Hz), 3.22 (2H, d,  $J$  = 8.0 Hz,  $\text{CH}_2\text{Ph}$ ), 1.20 (3H, t,  $J$  = 8.0 Hz,  $\text{OCH}_2\text{CH}_3$ );  $^{13}\text{C}$  NMR ( $\text{CDCl}_3$ , DEPT-135)  $\delta$  169.3 (C, O-C=O), 168.8 (C, O-C=O), 137.8 (C), 128.8 (2 x CH), 128.5 (2 x CH), 126.8 (CH), 61.5 ( $\text{CH}_2$ ,  $\text{OCH}_2\text{CH}_3$ ), 53.7 ( $\text{CH}_3$ ,  $\text{OCH}_3$ ), 52.5 (CH), 34.7 ( $\text{CH}_2$ ,  $\text{CH}_2\text{Ph}$ ), 14.0 ( $\text{CH}_3$ ,  $\text{OCH}_2\text{CH}_3$ ); LCMS:  $m/z$  237.00 ( $\text{M}+\text{H}^+$ ), calcd  $\text{C}_{13}\text{H}_{16}\text{O}_4$  236.24; Anal. calcd for  $\text{C}_{13}\text{H}_{16}\text{O}_4$  (236.24): C, 66.09; H, 6.83. Found: C, 66.078; H, 6.850%.

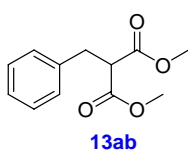

**2-Benzyl-malonic acid dimethyl ester (13ab):** Purified by column chromatography using EtOAc/hexane and isolated as oil. IR (neat):  $\nu_{\text{max}}$  3007, 2955, 1737 (O-C=O), 1732 (O-C=O), 1437, 1344, 1273, 1232, 1152, 1027, 753 and 700  $\text{cm}^{-1}$ ;  $^1\text{H}$  NMR ( $\text{CDCl}_3$ )  $\delta$  7.30–7.18 (5H, m) [Ar-*H*]; 3.69 (6H, s,  $\text{OCH}_3$ ), 3.67 (1H, t,  $J$  = 8.0 Hz), 3.22 (2H, d,  $J$  = 8.0 Hz);  $^{13}\text{C}$  NMR ( $\text{CDCl}_3$ , DEPT-135)  $\delta$  169.2 (2 x C, O-C=O), 137.7 (C), 128.7 (2 x CH), 128.5 (2 x CH), 126.8 (CH), 53.6 (CH), 52.5 (2 x  $\text{CH}_3$ ,  $\text{OCH}_3$ ), 34.7 ( $\text{CH}_2$ ,  $\text{CH}_2\text{Ph}$ ); LCMS:  $m/z$  221.00 ( $\text{M}-\text{H}^+$ ), calcd  $\text{C}_{12}\text{H}_{14}\text{O}_4$  222.24; Anal. calcd for  $\text{C}_{12}\text{H}_{14}\text{O}_4$  (222.24): C, 64.85; H, 6.35. Found: C, 64.733; H, 6.338%.

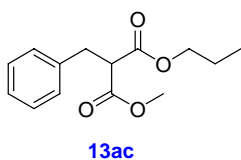

**2-Benzyl-malonic acid methyl ester propyl ester (13ac):** Purified by column chromatography using EtOAc/hexane and isolated as oil. IR (neat):  $\nu_{\text{max}}$  2982, 1736 (O-C=O), 1727 (O-C=O), 1439, 1367, 1273, 1143, 844, 752, 700 and 654  $\text{cm}^{-1}$ ;  $^1\text{H}$  NMR ( $\text{CDCl}_3$ )  $\delta$  7.29–7.19 (5H, m) [Ar-*H*]; 4.05 (2H, t,  $J$  = 6.4 Hz,  $\text{OCH}_2\text{CH}_2\text{CH}_3$ ), 3.69 (3H, s,  $\text{OCH}_3$ ), 3.67 (1H, t,  $J$  = 8.0 Hz), 3.23 (2H, d,  $J$  = 8.0 Hz,  $\text{CH}_2\text{Ph}$ ), 1.59 (2H, sextet,  $J$  = 7.2 Hz,  $\text{OCH}_2\text{CH}_2\text{CH}_3$ ), 0.86 (3H, t,  $J$  = 7.2 Hz,  $\text{OCH}_2\text{CH}_2\text{CH}_3$ );  $^{13}\text{C}$  NMR ( $\text{CDCl}_3$ , DEPT-135)  $\delta$  169.3 (C, O-C=O), 168.8 (C, O-C=O), 137.8 (C), 128.7 (2 x CH), 128.5 (2 x CH), 126.7 (CH), 67.0 ( $\text{CH}_2$ ,  $\text{OCH}_2\text{CH}_2\text{CH}_3$ ), 53.7 ( $\text{CH}_3$ ,  $\text{OCH}_3$ ), 52.4 (CH), 34.7 ( $\text{CH}_2$ ), 21.7 ( $\text{CH}_2$ ), 10.1 ( $\text{CH}_3$ ); LCMS:  $m/z$  251.00 ( $\text{M}+\text{H}^+$ ), calcd  $\text{C}_{14}\text{H}_{18}\text{O}_4$  250.29; Anal. calcd for  $\text{C}_{14}\text{H}_{18}\text{O}_4$  (250.29): C, 67.18; H, 7.25. Found: C, 67.160; H, 7.232%.

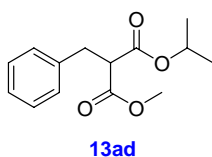

**2-Benzyl-malonic acid isopropyl ester methyl ester (13ad):** Purified by column chromatography using EtOAc/hexane and isolated as oil. IR (neat):  $\nu_{\text{max}}$  2984, 1736 (O-C=O), 1728 (O-C=O), 1439, 1274, 1232, 1155, 1105, 752 and 699  $\text{cm}^{-1}$ ;  $^1\text{H}$  NMR ( $\text{CDCl}_3$ )  $\delta$  7.29–7.19 (5H, m) [Ar-*H*]; 4.99 (1H,

septet,  $J = 6.4$  Hz,  $\text{OCH}(\text{CH}_3)_2$ ), 3.70 (3H, s,  $\text{OCH}_3$ ), 3.63 (1H, t,  $J = 8.0$  Hz), 3.20 (2H, d,  $J = 8.0$  Hz,  $\text{CH}_2\text{Ph}$ ), 1.20 (3H, d,  $J = 6.0$  Hz), 1.13 (3H, d,  $J = 6.4$  Hz) [ $\text{OCH}(\text{CH}_3)_2$ ];  $^{13}\text{C}$  NMR ( $\text{CDCl}_3$ , DEPT-135)  $\delta$  169.4 (C, O-C=O), 168.2 (C, O-C=O), 137.8 (C), 128.8 (2 x CH), 128.4 (2 x CH), 126.7 (CH), 69.1 (CH,  $\text{OCH}(\text{CH}_3)_2$ ), 53.8 ( $\text{CH}_3$ ,  $\text{OCH}_3$ ), 52.4 (CH), 34.6 ( $\text{CH}_2$ ), 21.5 (2 x  $\text{CH}_3$ ); LCMS:  $m/z$  251.00 ( $\text{M}+\text{H}^+$ ), calcd  $\text{C}_{14}\text{H}_{18}\text{O}_4$  250.29; Anal. calcd for  $\text{C}_{14}\text{H}_{18}\text{O}_4$  (250.29): C, 67.18; H, 7.25. Found: C, 67.101; H, 7.266%.

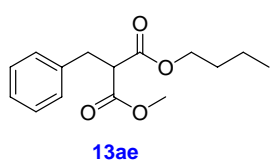

**2-Benzyl-malonic acid butyl ester methyl ester (13ae):** Purified

by column chromatography using EtOAc/hexane and isolated as oil. IR (neat):  $\nu_{\text{max}}$  2961, 1736 (O-C=O), 1731 (O-C=O), 1275,

1267, 1230, 1151, 753, 699 and 632  $\text{cm}^{-1}$ ;  $^1\text{H}$  NMR ( $\text{CDCl}_3$ )  $\delta$

7.29–7.19 (5H, m) [Ar-H]; 4.10 (2H, t,  $J = 6.4$  Hz,  $\text{OCH}_2(\text{CH}_2)_2\text{CH}_3$ ), 3.69 (3H, s,  $\text{OCH}_3$ ), 3.67 (1H, t,  $J = 8.0$  Hz), 3.23 (2H, d,  $J = 8.0$  Hz,  $\text{CH}_2\text{Ph}$ ), 1.53 (2H, quintet,  $J = 6.4$  Hz,  $\text{OCH}_2\text{CH}_2\text{CH}_2\text{CH}_3$ ), 1.29 (2H, sextet,  $J = 6.4$  Hz,  $\text{OCH}_2\text{CH}_2\text{CH}_2\text{CH}_3$ ), 0.88 (3H, t,  $J = 8.0$  Hz,  $\text{OCH}_2\text{CH}_2\text{CH}_2\text{CH}_3$ );  $^{13}\text{C}$  NMR ( $\text{CDCl}_3$ , DEPT-135)  $\delta$  169.3 (C, O-C=O), 168.8 (C, O-C=O), 137.8 (C), 128.7 (2 x CH), 128.5 (2 x CH), 126.7 (CH), 65.3 ( $\text{CH}_2$ ,  $\text{OCH}_2(\text{CH}_2)_2\text{CH}_3$ ), 53.7 ( $\text{CH}_3$ ,  $\text{OCH}_3$ ), 52.4 (CH), 34.7 ( $\text{CH}_2$ ), 30.4 ( $\text{CH}_2$ ), 18.9 ( $\text{CH}_2$ ), 13.5 ( $\text{CH}_3$ ,  $\text{OCH}_2\text{CH}_2\text{CH}_2\text{CH}_3$ ); LCMS:  $m/z$  265.00 ( $\text{M}+\text{H}^+$ ), calcd  $\text{C}_{15}\text{H}_{20}\text{O}_4$  264.32; Anal. calcd for  $\text{C}_{15}\text{H}_{20}\text{O}_4$  (264.32): C, 68.16; H, 7.63. Found: C, 68.162; H, 7.601%.

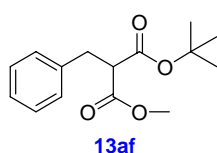

**2-Benzyl-malonic acid tert-butyl ester methyl ester (13af):** Purified

by column chromatography using EtOAc/hexane and isolated as oil.

IR (neat):  $\nu_{\text{max}}$  2981, 2927, 2854, 1735 (O-C=O), 1730 (O-C=O),

1368, 1274, 1144, 752 and 700  $\text{cm}^{-1}$ ;  $^1\text{H}$  NMR ( $\text{CDCl}_3$ )  $\delta$  7.27–7.20,

(5H, m) [Ar-H]; 3.70 (3H, s,  $\text{OCH}_3$ ), 3.58 (1H, t,  $J = 8.0$  Hz), 3.18 (2H, d,  $J = 8.0$  Hz,  $\text{CH}_2\text{Ph}$ ), 1.39 (9H, s, 3 x  $\text{CH}_3$ );  $^{13}\text{C}$  NMR ( $\text{CDCl}_3$ , DEPT-135)  $\delta$  169.7 (C, O-C=O), 167.8 (C, O-C=O), 138.0 (C), 128.8 (2 x CH), 128.4 (2 x CH), 126.6 (CH), 82.0 (C,  $\text{OC}(\text{CH}_3)_3$ ), 54.6 ( $\text{CH}_3$ ,  $\text{OCH}_3$ ), 52.3 (CH), 34.7 ( $\text{CH}_2$ ,  $\text{CH}_2\text{Ph}$ ), 27.8 (3 x  $\text{CH}_3$ ,  $\text{OC}(\text{CH}_3)_3$ ); LCMS:  $m/z$  265.14 ( $\text{M}+\text{H}^+$ ), calcd  $\text{C}_{15}\text{H}_{20}\text{O}_4$  264.14;

Anal. calcd for  $\text{C}_{15}\text{H}_{20}\text{O}_4$  (264.14): C, 68.16; H, 7.63. Found: C, 68.205; H, 7.652%.

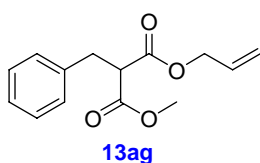

**2-Benzyl-malonic acid allyl ester methyl ester (13ag):** Purified

by column chromatography using EtOAc/hexane and isolated as oil. IR (neat):  $\nu_{\text{max}}$  2923,

2853, 1736 (O-C=O), 1442, 1275, 1228, 1150, 753 and 698  $\text{cm}^{-1}$ ;  $^1\text{H}$  NMR ( $\text{CDCl}_3$ )  $\delta$  7.30–7.19 (5H, m) [Ar-H]; 5.88–5.78 (1H, m,  $\text{OCH}_2\text{CH}=\text{CH}_2$ ), 5.27–5.19 (2H, m,  $\text{OCH}_2\text{CH}=\text{CH}_2$ ), 4.59 (2H, d,  $J = 8.0$  Hz,  $\text{OCH}_2\text{CH}=\text{CH}_2$ ), 3.71 (1H, t,  $J = 8.0$  Hz), 3.70 (3H, s,  $\text{OCH}_3$ ), 3.24 (2H, d,  $J = 8.0$  Hz,  $\text{CH}_2\text{Ph}$ );  $^{13}\text{C}$  NMR ( $\text{CDCl}_3$ , DEPT-135)  $\delta$  169.2 (C, O-C=O), 168.4 (C, O-C=O), 137.7 (C), 131.5 (CH), 128.9 (2 x CH), 128.6 (2 x CH), 126.8 (CH), 118.6 ( $\text{CH}_2$ ,  $\text{OCH}_2\text{CH}=\text{CH}_2$ ), 66.0 ( $\text{CH}_2$ ,  $\text{OCH}_2\text{CH}=\text{CH}_2$ ), 53.7 ( $\text{CH}_3$ ,  $\text{OCH}_3$ ), 52.5 (CH), 34.8 ( $\text{CH}_2$ ,  $\text{CH}_2\text{Ph}$ ); LCMS:  $m/z$  247.00 ( $\text{M-H}^+$ ), calcd  $\text{C}_{14}\text{H}_{16}\text{O}_4$  248.27; Anal. calcd for  $\text{C}_{14}\text{H}_{16}\text{O}_4$  (248.27): C, 67.73; H, 6.50. Found: C, 67.699; H, 6.498%.

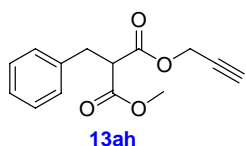

**2-Benzyl-malonic acid methyl ester prop-2-ynyl ester (13ah):**

Purified by column chromatography using EtOAc/hexane and isolated as oil. IR (neat):  $\nu_{\text{max}}$  3286, 3008, 1737 (O-C=O), 1438, 1275, 1147, 1030, 753, 700  $\text{cm}^{-1}$ ;  $^1\text{H}$  NMR ( $\text{CDCl}_3$ )  $\delta$  7.30–7.19 (5H, m) [Ar-H]; 4.68 (2H, d,  $J = 2.4$  Hz,  $\text{OCH}_2\text{C}\equiv\text{CH}$ ), 3.71 (3H, s,  $\text{OCH}_3$ ), 3.70 (1H, t,  $J = 8.0$  Hz), 3.24 (2H, d,  $J = 8.0$  Hz,  $\text{CH}_2\text{Ph}$ ), 2.46 (1H, t,  $J = 2.4$  Hz,  $\text{OCH}_2\text{C}\equiv\text{CH}$ );  $^{13}\text{C}$  NMR ( $\text{CDCl}_3$ , DEPT-135)  $\delta$  168.7 (C, O-C=O), 167.9 (C, O-C=O), 137.4 (C), 128.8 (2 x CH), 128.5 (2 x CH), 126.8 (CH), 76.9 (C,  $\text{OCH}_2\text{C}\equiv\text{CH}$ ), 75.3 (CH,  $\text{OCH}_2\text{C}\equiv\text{CH}$ ), 53.4 ( $\text{CH}_3$ ,  $\text{OCH}_3$ ), 52.8 ( $\text{CH}_2$ ,  $\text{OCH}_2\text{C}\equiv\text{CH}$ ), 52.6 (CH), 34.6 ( $\text{CH}_2$ ,  $\text{CH}_2\text{Ph}$ ); LCMS:  $m/z$  247.00 ( $\text{M}+\text{H}^+$ ), calcd  $\text{C}_{14}\text{H}_{14}\text{O}_4$  246.09; Anal. calcd for  $\text{C}_{14}\text{H}_{14}\text{O}_4$  (246.09): C, 68.28; H, 5.73. Found: C, 68.245; H, 5.715%.

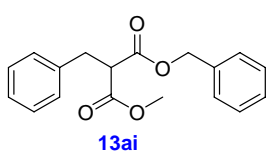

**2-Benzyl-malonic acid benzyl ester methyl ester (13ai) and 2-Benzyl-malonic acid dimethyl ester (13ab):**

Purified by column chromatography using EtOAc/hexane and isolated as oil. IR (neat):  $\nu_{\text{max}}$  2919, 2850, 1736 (O-C=O), 1444, 1269, 1226, 1148, 748 and 699  $\text{cm}^{-1}$ ;  $^1\text{H}$  NMR ( $\text{CDCl}_3$ , 6:1 ratio of compounds **13ai** and **13ab**, major compound **13ai**)  $\delta$  7.35–7.22 (10H, m) [Ar-H]; 5.14 (2H, s,  $\text{OCH}_2\text{Ph}$ ), 3.74 (1H, t,  $J = 7.6$  Hz), 3.68 (3H, s,  $\text{OCH}_3$ ), 3.24 (2H, d,  $J = 8.0$  Hz,  $\text{CH}_2\text{Ph}$ );  $^{13}\text{C}$  NMR ( $\text{CDCl}_3$ , DEPT-135, 6:1 ratio of compounds **13ai** and **13ab**, major compound **13ai**)  $\delta$  169.1 (C, O-C=O), 168.6 (C, O-C=O), 137.6 (C), 135.3 (C), 128.8 (2 x CH), 128.52 (2 x CH), 128.50 (2 x CH), 128.2 (CH), 128.0 (2 x CH), 126.8 (CH), 67.1 ( $\text{CH}_2$ ,  $\text{OCH}_2\text{Ph}$ ), 53.7 ( $\text{CH}_3$ ,  $\text{OCH}_3$ ), 52.5 (CH), 34.7 ( $\text{CH}_2$ ,

CH<sub>2</sub>Ph); LCMS: *m/z* 299.00 (M+H<sup>+</sup>), calcd C<sub>18</sub>H<sub>18</sub>O<sub>4</sub> 298.12; Anal. calcd for C<sub>18</sub>H<sub>18</sub>O<sub>4</sub> (298.12): C, 72.47; H, 6.08. Found: C, 72.549; H, 6.119%.

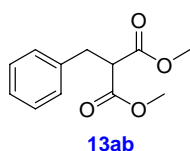

13ab

<sup>1</sup>H NMR (CDCl<sub>3</sub>, 6:1 ratio of compounds **13ai** and **13ab**, minor compound **13ab**) δ 7.35–7.22 (5H, m) [Ar-*H*]; 3.71 (6H, s, 2 x OCH<sub>3</sub>), 3.70 (1H, t, *J* = 7.6 Hz), 3.23 (2H, d, *J* = 7.6 Hz, CH<sub>2</sub>Ph); <sup>13</sup>C NMR (CDCl<sub>3</sub>, DEPT-135, 6:1 ratio of compounds **13ai** and **13ab**, minor compound **13ab**) δ 169.1 (2 x C, O-C=O), 137.6 (C), 128.6 (2 x CH), 128.4 (2 x CH), 126.7 (CH), 53.5 (CH), 52.4 (2 x CH<sub>3</sub>, OCH<sub>3</sub>), 34.75 (CH<sub>2</sub>, CH<sub>2</sub>Ph).

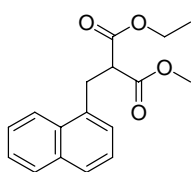

13ba

**2-Naphthalen-1-ylmethyl-malonic acid ethyl ester methyl ester**

**(13ba):** Purified by column chromatography using EtOAc/hexane and isolated as oil. IR (neat): *v*<sub>max</sub> 1736 (O-C=O), 1731 (O-C=O), 1438, 1337, 1280, 1227, 1151, 1028, 798, 778 and 647 cm<sup>-1</sup>; <sup>1</sup>H NMR (CDCl<sub>3</sub>) δ 8.05 (1H, d, *J* = 8.4 Hz), 7.87 (1H, d, *J* = 8.8 Hz), 7.75 (1H, t, *J* = 4.8 Hz), 7.57-7.50 (2H, m), 7.38 (2H, d, *J* = 5.2 Hz) [Ar-*H*]; 4.16 (2H, dq, *J* = 7.2, 1.2 Hz, OCH<sub>2</sub>CH<sub>3</sub>), 3.89 (1H, t, *J* = 8.0 Hz), 3.73 (2H, d, *J* = 7.6 Hz, CH<sub>2</sub>Ar), 3.71 (3H, s, OCH<sub>3</sub>), 1.18 (3H, t, *J* = 7.2 Hz, OCH<sub>2</sub>CH<sub>3</sub>); <sup>13</sup>C NMR (CDCl<sub>3</sub>, DEPT-135) δ 169.4 (C, O-C=O), 168.9 (C, O-C=O), 133.9 (C), 133.7 (C), 131.5 (C), 128.9 (CH), 127.6 (CH), 127.1 (CH), 126.2 (CH), 125.6 (CH), 125.3 (CH), 123.1 (CH), 61.5 (CH<sub>2</sub>, OCH<sub>2</sub>CH<sub>3</sub>), 52.7 (CH<sub>3</sub>, OCH<sub>3</sub>), 52.4 (CH), 31.8 (CH<sub>2</sub>, CH<sub>2</sub>Ar), 13.9 (CH<sub>3</sub>, OCH<sub>2</sub>CH<sub>3</sub>); LCMS: *m/z* 285.00 (M-H<sup>+</sup>), calcd C<sub>17</sub>H<sub>18</sub>O<sub>4</sub> 286.12; Anal. calcd for C<sub>17</sub>H<sub>18</sub>O<sub>4</sub> (286.12): C, 71.31; H, 6.34. Found: C, 71.395; H, 6.360%.

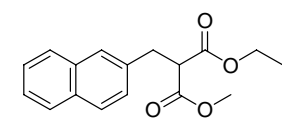

13ca

**2-Naphthalen-2-ylmethyl-malonic acid ethyl ester methyl ester**

**(13ca):** Purified by column chromatography using EtOAc/hexane and isolated as oil. IR (neat): *v*<sub>max</sub> 1736 (O-C=O), 1731 (O-C=O), 1439, 1337, 1274, 1232, 1151, 1032, 818 and 752 cm<sup>-1</sup>; <sup>1</sup>H NMR (CDCl<sub>3</sub>) δ 7.82-7.77 (3H, m), 7.68 (1H, br s), 7.48-7.43 (2H, m), 7.35 (1H, dd, *J* = 8.4, 1.2 Hz) [Ar-*H*]; 4.17 (2H, dq, *J* = 7.2, 1.6 Hz, OCH<sub>2</sub>CH<sub>3</sub>), 3.80 (1H, t, *J* = 8.0 Hz), 3.71 (3H, s, OCH<sub>3</sub>), 3.42 (2H, d, *J* = 7.6 Hz, CH<sub>2</sub>Ar), 1.19 (3H, t, *J* = 7.2 Hz, OCH<sub>2</sub>CH<sub>3</sub>); <sup>13</sup>C NMR (CDCl<sub>3</sub>, DEPT-135) δ 169.2 (C, O-C=O), 168.6 (C, O-C=O), 135.2 (C), 133.4 (C), 132.3 (C), 128.1 (CH), 127.5 (2 x CH), 127.3 (CH), 127.0 (CH), 126.0 (CH), 125.5 (CH), 61.4 (CH<sub>2</sub>, OCH<sub>2</sub>CH<sub>3</sub>), 53.6 (CH<sub>3</sub>, OCH<sub>3</sub>), 52.4 (CH), 34.8

(CH<sub>2</sub>, CH<sub>2</sub>Ar), 13.9 (CH<sub>3</sub>, OCH<sub>2</sub>CH<sub>3</sub>); LCMS: *m/z* 285.00 (M-H<sup>+</sup>), calcd C<sub>17</sub>H<sub>18</sub>O<sub>4</sub> 286.12; Anal. calcd for C<sub>17</sub>H<sub>18</sub>O<sub>4</sub> (286.12): C, 71.31; H, 6.34. Found: C, 71.400; H, 6.328%.

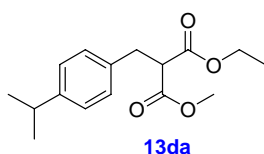

**2-(4-Isopropyl-benzyl)-malonic acid ethyl ester methyl ester**

**(13da):** Purified by column chromatography using EtOAc/hexane and isolated as oil. IR (neat):  $\nu_{\max}$  2962, 1736 (O-C=O), 1731 (O-C=O), 1335, 1273, 1228, 1150, 1033 and 754 cm<sup>-1</sup>; <sup>1</sup>H NMR

(CDCl<sub>3</sub>)  $\delta$  7.13 (4H, s, Ar-H), 4.15 (2H, q, *J* = 8.0 Hz, OCH<sub>2</sub>CH<sub>3</sub>), 3.70 (3H, s, OCH<sub>3</sub>), 3.65 (1H, t, *J* = 8.0 Hz), 3.19 (2H, d, *J* = 8.0 Hz, CH<sub>2</sub>Ar), 2.87 (1H, septet, *J* = 8.0 Hz), 1.23 (6H, d, *J* = 4.0 Hz, CH(CH<sub>3</sub>)<sub>2</sub>), 1.19 (3H, t, *J* = 8.0 Hz, OCH<sub>2</sub>CH<sub>3</sub>); <sup>13</sup>C NMR (CDCl<sub>3</sub>, DEPT-135)  $\delta$  169.4 (C, O-C=O), 168.8 (C, O-C=O), 147.3 (C), 135.1 (C), 128.7 (2 x CH), 126.5 (2 x CH), 61.4 (CH<sub>2</sub>, OCH<sub>2</sub>CH<sub>3</sub>), 53.8 (CH<sub>3</sub>, OCH<sub>3</sub>), 52.4 (CH), 34.3 (CH<sub>2</sub>, CH<sub>2</sub>Ar), 33.7 (CH), 24.0 (2 x CH<sub>3</sub>), 14.0 (CH<sub>3</sub>, OCH<sub>2</sub>CH<sub>3</sub>); LCMS: *m/z* 279.00 (M+H<sup>+</sup>), calcd C<sub>16</sub>H<sub>22</sub>O<sub>4</sub> 278.15; Anal. calcd for C<sub>16</sub>H<sub>22</sub>O<sub>4</sub> (278.15): C, 69.04; H, 7.97. Found: C, 69.089; H, 7.924%.

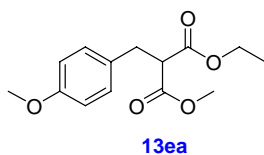

**2-(4-Methoxy-benzyl)-malonic acid ethyl ester methyl ester**

**(13ea):** Purified by column chromatography using EtOAc/hexane and isolated as oil. IR (neat):  $\nu_{\max}$  2986, 1736 (O-C=O), 1731 (O-C=O), 1540, 1513, 1442, 1247, 1178, 1151, 1032, 832 and 755

cm<sup>-1</sup>; <sup>1</sup>H NMR (CDCl<sub>3</sub>)  $\delta$  7.10 (2H, d, *J* = 8.8 Hz), 6.79 (2H, d, *J* = 8.4 Hz) [Ar-H]; 4.13 (2H, q, *J* = 7.2 Hz, OCH<sub>2</sub>CH<sub>3</sub>), 3.75 (3H, s, OCH<sub>3</sub>), 3.68 (3H, s, OCH<sub>3</sub>), 3.60 (1H, t, *J* = 7.6 Hz), 3.14 (2H, d, *J* = 8.0 Hz, CH<sub>2</sub>Ar), 1.19 (3H, t, *J* = 7.2 Hz, OCH<sub>2</sub>CH<sub>3</sub>); <sup>13</sup>C NMR (CDCl<sub>3</sub>, DEPT-135)  $\delta$  169.3 (C, O-C=O), 168.7 (C, O-C=O), 158.3 (C), 129.71 (2 x CH), 129.68 (C), 113.8 (2 x CH), 61.4 (CH<sub>2</sub>, OCH<sub>2</sub>CH<sub>3</sub>), 55.1 (CH<sub>3</sub>, OCH<sub>3</sub>), 53.9 (CH<sub>3</sub>, OCH<sub>3</sub>), 52.3 (CH), 33.8 (CH<sub>2</sub>, CH<sub>2</sub>Ar), 13.9 (CH<sub>3</sub>, OCH<sub>2</sub>CH<sub>3</sub>); LCMS: *m/z* 267.00 (M+H<sup>+</sup>), calcd C<sub>14</sub>H<sub>18</sub>O<sub>5</sub> 266.12; Anal. calcd for C<sub>14</sub>H<sub>18</sub>O<sub>5</sub> (266.12): C, 63.15; H, 6.81.

Found: C, 63.153; H, 6.886%.

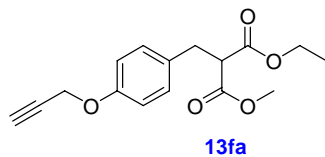

**2-(4-Prop-2-ynoxy-benzyl)-malonic acid ethyl ester methyl ester**

**(13fa):** Purified by column chromatography using EtOAc/hexane and isolated as oil. IR (neat):  $\nu_{\max}$  3285

(C=C-H), 1730 (O-C=O), 1608, 1512, 1442, 1370, 1341, 1222, 1178, 1153, 1113, 1028,



829 and 668  $\text{cm}^{-1}$ ;  $^1\text{H}$  NMR ( $\text{CDCl}_3$ )  $\delta$  7.12 (2H, d,  $J = 8.0$  Hz), 6.88 (2H, d,  $J = 8.0$  Hz) [Ar-*H*]; 4.64 (2H, d,  $J = 4.0$  Hz,  $\text{OCH}_2\text{C}\equiv\text{CH}$ ), 4.14 (2H, q,  $J = 8.0$  Hz,  $\text{OCH}_2\text{CH}_3$ ), 3.68 (3H, s,  $\text{OCH}_3$ ), 3.61 (1H, t,  $J = 8.0$  Hz), 3.15 (2H, d,  $J = 8.0$  Hz,  $\text{CH}_2\text{Ar}$ ), 2.50 (1H, t,  $J = 4.0$  Hz,  $\text{OCH}_2\text{C}\equiv\text{CH}$ ), 1.19 (3H, t,  $J = 8.0$  Hz,  $\text{OCH}_2\text{CH}_3$ );  $^{13}\text{C}$  NMR ( $\text{CDCl}_3$ , DEPT-135)  $\delta$  169.3 (C, O-C=O), 168.7 (C, O-C=O), 156.3 (C), 130.7 (C), 129.8 (2 x CH), 114.9 (2 x CH), 78.5 (C,  $\text{OCH}_2\text{C}\equiv\text{CH}$ ), 75.4 (C,  $\text{OCH}_2\text{C}\equiv\text{CH}$ ), 61.4 ( $\text{CH}_2$ ,  $\text{OCH}_2\text{CH}_3$ ), 55.7 ( $\text{CH}_2$ ,  $\text{OCH}_2\text{C}\equiv\text{CH}$ ), 53.8 ( $\text{CH}_3$ ,  $\text{OCH}_3$ ), 52.4 (CH), 33.8 ( $\text{CH}_2$ ,  $\text{CH}_2\text{Ar}$ ), 13.9 ( $\text{CH}_3$ ,  $\text{OCH}_2\text{CH}_3$ ); LCMS:  $m/z$  291.00 ( $\text{M}+\text{H}^+$ ), calcd  $\text{C}_{16}\text{H}_{18}\text{O}_5$  290.12; Anal. calcd for  $\text{C}_{16}\text{H}_{18}\text{O}_5$  (290.12): C, 66.19; H, 6.25. Found: C, 66.196; H, 6.267%.

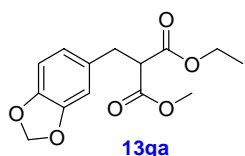

**2-Benzo[1,3]dioxol-5-ylmethyl-malonic acid ethyl ester methyl ester (13ga):** Purified by column chromatography using

EtOAc/hexane and isolated as oil. IR (neat):  $\nu_{\text{max}}$  2986, 1736 (O-C=O), 1731 (O-C=O), 1492, 1443, 1368, 1275, 1251, 1194, 1152, 1037, 930, 810 and 754  $\text{cm}^{-1}$ ;  $^1\text{H}$  NMR ( $\text{CDCl}_3$ )  $\delta$  6.69-6.66 (2H, m), 6.63-6.60 (1H, m) [Ar-*H*]; 5.88 (2H, s,  $\text{OCH}_2\text{O}$ ), 4.13 (2H, q,  $J = 6.8$  Hz,  $\text{OCH}_2\text{CH}_3$ ), 3.67 (3H, s,  $\text{OCH}_3$ ), 3.57 (1H, t,  $J = 8.0$  Hz), 3.10 (2H, d,  $J = 8.0$  Hz,  $\text{CH}_2\text{Ar}$ ), 1.19 (3H, t,  $J = 8.0$  Hz,  $\text{OCH}_2\text{CH}_3$ );  $^{13}\text{C}$  NMR ( $\text{CDCl}_3$ , DEPT-135)  $\delta$  169.1 (C, O-C=O), 168.6 (C, O-C=O), 147.6 (C), 146.2 (C), 131.4 (C), 121.7 (CH), 109.1 (CH), 108.1 (CH), 100.8 ( $\text{CH}_2$ ,  $\text{OCH}_2\text{O}$ ), 61.4 ( $\text{CH}_2$ ,  $\text{OCH}_2\text{CH}_3$ ), 53.9 ( $\text{CH}_3$ ,  $\text{OCH}_3$ ), 52.3 (CH), 34.4 ( $\text{CH}_2$ ,  $\text{CH}_2\text{Ar}$ ), 13.9 ( $\text{CH}_3$ ,  $\text{OCH}_2\text{CH}_3$ ); LCMS:  $m/z$  281.00 ( $\text{M}+\text{H}^+$ ), calcd  $\text{C}_{14}\text{H}_{16}\text{O}_6$  280.09; Anal. calcd for  $\text{C}_{14}\text{H}_{16}\text{O}_6$  (280.09): C, 59.99; H, 5.75. Found: C, 59.902; H, 5.821%.

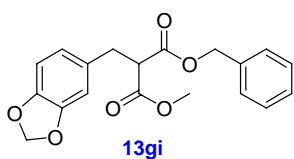

**2-Benzo[1,3]dioxol-5-ylmethyl-malonic acid benzyl ester methyl ester (13gi):** Purified by column chromatography using

EtOAc/hexane and isolated as oil. IR (neat):  $\nu_{\text{max}}$  2954, 2919, 1732 (O-C=O), 1493, 1443, 1338, 1246, 1148, 1038, 931, 745, 698 and 640  $\text{cm}^{-1}$ ;  $^1\text{H}$  NMR ( $\text{CDCl}_3$ )  $\delta$  7.36-7.25 (5H, m), 6.69-6.60 (3H, m) [Ar-*H*]; 5.91 (2H, s,  $\text{OCH}_2\text{O}$ ), 5.14 (2H, s,  $\text{OCH}_2\text{Ph}$ ), 3.68 (3H, s,  $\text{OCH}_3$ ), 3.66 (1H, t,  $J = 8.0$  Hz), 3.15 (2H, d,  $J = 8.0$  Hz,  $\text{CH}_2\text{Ar}$ );  $^{13}\text{C}$  NMR ( $\text{CDCl}_3$ , DEPT-135)  $\delta$  169.0 (C, O-C=O), 168.5 (C, O-C=O), 147.7 (C), 146.4 (C), 135.3 (C), 131.3 (C), 128.5 (2 x CH), 128.3 (CH), 128.1 (2 x CH), 121.9 (CH), 109.2 (CH), 108.3 (CH), 100.9 ( $\text{CH}_2$ ,  $\text{OCH}_2\text{O}$ ), 67.1 ( $\text{CH}_2$ ,  $\text{OCH}_2\text{Ph}$ ), 54.0 ( $\text{CH}_3$ ,  $\text{OCH}_3$ ), 52.5 (CH), 34.5 ( $\text{CH}_2$ ,  $\text{CH}_2\text{Ar}$ ); LCMS:  $m/z$  341.00

(M-H<sup>+</sup>), calcd C<sub>19</sub>H<sub>18</sub>O<sub>6</sub> 342.11; Anal. calcd for C<sub>19</sub>H<sub>18</sub>O<sub>6</sub> (342.11): C, 66.66; H, 5.30. Found: C, 66.523; H, 5.360%.

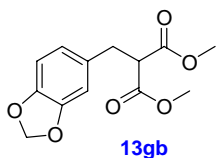

**2-Benzo[1,3]dioxol-5-ylmethyl-malonic acid dimethyl ester**

**(13gb):** Purified by column chromatography using EtOAc/hexane and isolated as oil. IR (neat):  $\nu_{\max}$  2956, 1736 (O-C=O), 1493, 1441, 1340, 1246, 1152, 1038, 931, 811 and 624 cm<sup>-1</sup>; <sup>1</sup>H NMR (CDCl<sub>3</sub>)  $\delta$  6.70-

6.62 (3H, m) [Ar-H]; 5.90 (2H, s, OCH<sub>2</sub>O), 3.69 (6H, s, 2 x OCH<sub>3</sub>), 3.60 (1H, t,  $J$  = 7.6 Hz), 3.12 (2H, d,  $J$  = 7.6 Hz, CH<sub>2</sub>Ar); <sup>13</sup>C NMR (CDCl<sub>3</sub>, DEPT-135)  $\delta$  169.1 (2 x C, O-C=O), 147.6 (C), 146.4 (C), 131.4 (C), 121.8 (CH), 109.1 (CH), 108.2 (CH), 100.9 (CH<sub>2</sub>, OCH<sub>2</sub>O), 53.8 (CH), 52.5 (2 x CH<sub>3</sub>, OCH<sub>3</sub>), 34.4 (CH<sub>2</sub>, CH<sub>2</sub>Ar); LCMS:  $m/z$  267.00 (M+H<sup>+</sup>), calcd C<sub>13</sub>H<sub>14</sub>O<sub>6</sub> 266.08; Anal. calcd for C<sub>13</sub>H<sub>14</sub>O<sub>6</sub> (266.08): C, 58.64; H, 5.30. Found: C, 58.605; H, 5.334%.

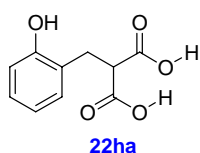

**2-(2-Hydroxy-benzyl)-malonic acid (22ha):** Purified by simple

acid/base workup and isolated as solid. IR (neat):  $\nu_{\max}$  3452 (CO<sub>2</sub>H), 3304 (O-H), 3044, 1687, 1703 (O-C=O), 1677 (O-C=O), 1604, 1257, 1234, 1102, 763, 744 and 615 cm<sup>-1</sup>; <sup>1</sup>H NMR (DMSO-D<sub>6</sub>)  $\delta$  9.49 (1H,

br s, O-H), 7.00 (1H, t,  $J$  = 6.4 Hz), 6.99 (1H, d,  $J$  = 7.6 Hz), 6.76 (1H, d,  $J$  = 7.6 Hz), 6.66 (1H, t,  $J$  = 7.2 Hz) [Ar-H]; 3.62 (1H, t,  $J$  = 7.6 Hz), 2.94 (2H, d,  $J$  = 7.6 Hz); <sup>13</sup>C NMR (DMSO-D<sub>6</sub>, DEPT-135)  $\delta$  170.8 (2 x C, O-C=O), 155.5 (C), 130.7 (CH), 127.8 (CH), 124.6 (C), 119.0 (CH), 115.0 (CH), 51.4 (CH), 29.9 (CH<sub>2</sub>, CH<sub>2</sub>Ph).

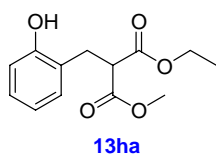

**2-(2-Hydroxy-benzyl)-malonic acid ethyl ester methyl ester**

**(13ha):** Purified by column chromatography using EtOAc/hexane and isolated as oil. IR (neat):  $\nu_{\max}$  3417 (O-H), 1727 (O-C=O), 1598, 1457, 1348, 1234, 1157, 1037, 911, 733 and 649 cm<sup>-1</sup>; <sup>1</sup>H NMR

(CDCl<sub>3</sub>)  $\delta$  7.14–7.09 (2H, m), 6.86 (1H, br t,  $J$  = 5.4 Hz), 6.85 (1H, d,  $J$  = 7.8 Hz), [Ar-H]; 6.73 (1H, br s, OH), 4.22–4.15 (2H, m, OCH<sub>2</sub>CH<sub>3</sub>), 3.79 (1H, t,  $J$  = 7.2 Hz), 3.73 (3H, s, OCH<sub>3</sub>), 3.18 (2H, d,  $J$  = 7.4 Hz, CH<sub>2</sub>Ar), 1.22 (3H, t,  $J$  = 7.1 Hz, OCH<sub>2</sub>CH<sub>3</sub>); <sup>13</sup>C NMR (CDCl<sub>3</sub>, DEPT-135)  $\delta$  170.3 (C, O-C=O), 169.8 (C, O-C=O), 154.3 (C), 131.0 (CH), 128.5 (CH), 124.2 (C), 120.9 (CH), 117.1 (CH), 62.0 (CH<sub>2</sub>, OCH<sub>2</sub>CH<sub>3</sub>), 52.9 (CH<sub>3</sub>, OCH<sub>3</sub>), 52.8 (CH), 29.2 (CH<sub>2</sub>, CH<sub>2</sub>Ar), 13.9 (CH<sub>3</sub>, OCH<sub>2</sub>CH<sub>3</sub>); LCMS:  $m/z$  251.00 (M-

H<sup>+</sup>), calcd C<sub>13</sub>H<sub>16</sub>O<sub>5</sub> 252.10; Anal. calcd for C<sub>13</sub>H<sub>16</sub>O<sub>5</sub> (252.10): C, 61.90; H, 6.39. Found: C, 61.787; H, 6.404%.

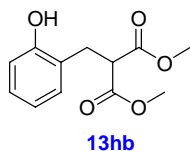

**2-(2-Hydroxy-benzyl)-malonic acid dimethyl ester (13hb):** Purified by column chromatography using EtOAc/hexane and isolated as oil. IR (neat):  $\nu_{\max}$  3452 (O-H), 2956, 1736 (O-C=O), 1728 (O-C=O), 1714, 1596, 1440, 1352, 1236, 1157, 1102, 1042, and 757 cm<sup>-1</sup>; <sup>1</sup>H NMR (CDCl<sub>3</sub>)  $\delta$  7.20-7.00 (2H, m), 6.84 (1H, t,  $J$  = 8.0 Hz), 6.82 (1H, d,  $J$  = 8.0 Hz) [Ar- $H$ ]; 3.84 (1H, t,  $J$  = 7.2 Hz), 3.72 (6H, s, 2 x OCH<sub>3</sub>), 3.19 (2H, d,  $J$  = 7.6 Hz, CH<sub>2</sub>Ar); <sup>13</sup>C NMR (CDCl<sub>3</sub>, DEPT-135)  $\delta$  170.2 (C, 2 x O-C=O), 154.3 (C), 131.0 (CH), 128.5 (CH), 124.0 (C), 120.7 (CH), 116.7 (CH), 52.8 (2 x CH<sub>3</sub>, OCH<sub>3</sub>), 52.4 (CH), 29.4 (CH<sub>2</sub>, CH<sub>2</sub>Ar); LCMS:  $m/z$  239.08 (M+H<sup>+</sup>), calcd C<sub>12</sub>H<sub>14</sub>O<sub>5</sub> 238.08; Anal. calcd for C<sub>12</sub>H<sub>14</sub>O<sub>5</sub> (238.08): C, 60.50; H, 5.92. Found: C, 60.618; H, 6.074%.

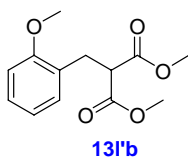

**2-(2-Methoxy-benzyl)-malonic acid dimethyl ester (131'b):** Purified by column chromatography using EtOAc/hexane and isolated as oil. IR (neat):  $\nu_{\max}$  2956, 1774 (O-C=O), 1743 (O-C=O), 1457, 1440, 1362, 1258, 1232, 1143, 1029, and 758 cm<sup>-1</sup>; <sup>1</sup>H NMR (CDCl<sub>3</sub>)  $\delta$  7.21 (1H, dt,  $J$  = 7.2, 1.2 Hz), 7.12 (1H, dd,  $J$  = 7.2, 1.2 Hz), 6.84 (1H, t,  $J$  = 7.2 Hz), 6.83 (1H, d,  $J$  = 7.2 Hz) [Ar- $H$ ]; 3.86 (1H, t,  $J$  = 8.0 Hz), 3.83 (3H, s, OCH<sub>3</sub>), 3.68 (6H, s, 2 x OCH<sub>3</sub>), 3.20 (2H, d,  $J$  = 8.0 Hz, CH<sub>2</sub>Ar); <sup>13</sup>C NMR (CDCl<sub>3</sub>, DEPT-135)  $\delta$  169.6 (C, 2 x O-C=O), 157.5 (C), 130.8 (CH), 128.2 (CH), 125.8 (C), 120.4 (CH), 110.1 (CH), 55.2 (CH<sub>3</sub>, OCH<sub>3</sub>), 52.4 (2 x CH<sub>3</sub>, 2 x OCH<sub>3</sub>), 51.3 (CH), 30.3 (CH<sub>2</sub>, CH<sub>2</sub>Ar); LCMS:  $m/z$  253.10 (M+H<sup>+</sup>), calcd C<sub>13</sub>H<sub>16</sub>O<sub>5</sub> 252.10; Anal. calcd for C<sub>13</sub>H<sub>16</sub>O<sub>5</sub> (252.10): C, 61.90; H, 6.39. Found: C, 61.918; H, 6.350%.

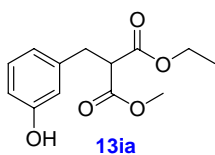

**2-(3-Hydroxy-benzyl)-malonic acid ethyl ester methyl ester (13ia):** Purified by column chromatography using EtOAc/hexane and isolated as oil. IR (neat):  $\nu_{\max}$  3399 (O-H), 2986, 1728 (O-C=O), 1594, 1444, 1338, 1274, 1156 and 754 cm<sup>-1</sup>; <sup>1</sup>H NMR (CDCl<sub>3</sub>)  $\delta$  7.15-7.11 (1H, m), 6.73 (3H, m) [Ar- $H$ ]; 4.17 (2H, q,  $J$  = 7.2 Hz, OCH<sub>2</sub>CH<sub>3</sub>), 3.71 (3H, s, OCH<sub>3</sub>), 3.68 (1H, t,  $J$  = 8.0 Hz), 3.17 (2H, d,  $J$  = 7.6 Hz, CH<sub>2</sub>Ar), 1.21 (3H, t,  $J$  = 7.2 Hz, OCH<sub>2</sub>CH<sub>3</sub>); <sup>13</sup>C NMR (CDCl<sub>3</sub>, DEPT-135)  $\delta$  169.6 (C, O-C=O), 169.1 (C, O-C=O), 156.1 (C), 139.2 (C), 129.7 (CH), 120.6 (CH), 115.7 (CH), 113.9 (CH), 61.7 (CH<sub>2</sub>, OCH<sub>2</sub>CH<sub>3</sub>), 53.6 (CH<sub>3</sub>,

OCH<sub>3</sub>), 52.6 (CH), 34.5 (CH<sub>2</sub>, CH<sub>2</sub>Ar), 13.9 (CH<sub>3</sub>, OCH<sub>2</sub>CH<sub>3</sub>); LCMS: *m/z* 253.00 (M+H<sup>+</sup>), calcd C<sub>13</sub>H<sub>16</sub>O<sub>5</sub> 252.10; Anal. calcd for C<sub>13</sub>H<sub>16</sub>O<sub>5</sub> (252.10): C, 61.90; H, 6.39. Found: C, 61.902; H, 6.375%.

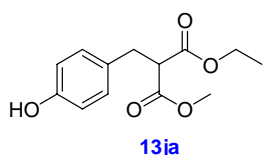

**2-(4-Hydroxy-benzyl)-malonic acid ethyl ester methyl ester**

**(13ja):** Purified by column chromatography using EtOAc/hexane and isolated as oil. IR (neat):  $\nu_{\max}$  3425 (O-H), 2986, 1728 (O-C=O), 1714 (O-C=O), 1615, 1515, 1443, 1341, 1232, 1155, 1103,

1030 and 830 cm<sup>-1</sup>; <sup>1</sup>H NMR (CDCl<sub>3</sub>)  $\delta$  7.02 (2H, d, *J* = 8.0 Hz), 6.72 (2H, d, *J* = 8.0 Hz) [Ar-*H*]; 4.14 (2H, q, *J* = 8.0 Hz, OCH<sub>2</sub>CH<sub>3</sub>), 3.69 (3H, s, OCH<sub>3</sub>), 3.62 (1H, t, *J* = 8.0 Hz), 3.13 (2H, d, *J* = 8.0 Hz, CH<sub>2</sub>Ar), 1.19 (3H, t, *J* = 8.0 Hz, OCH<sub>2</sub>CH<sub>3</sub>); <sup>13</sup>C NMR (CDCl<sub>3</sub>, DEPT-135)  $\delta$  169.7 (C, O-C=O), 169.1 (C, O-C=O), 154.8 (C), 129.9 (2 x CH), 129.3 (C), 115.4 (2 x CH), 61.7 (CH<sub>2</sub>, OCH<sub>2</sub>CH<sub>3</sub>), 54.1 (CH<sub>3</sub>, OCH<sub>3</sub>), 52.6 (CH), 33.9 (CH<sub>2</sub>, CH<sub>2</sub>Ar), 14.0 (CH<sub>3</sub>, OCH<sub>2</sub>CH<sub>3</sub>); LCMS: *m/z* 253.00 (M+H<sup>+</sup>), calcd C<sub>13</sub>H<sub>16</sub>O<sub>5</sub> 252.10; Anal. calcd for C<sub>13</sub>H<sub>16</sub>O<sub>5</sub> (252.10): C, 61.90; H, 6.39. Found: C, 61.800; H, 6.342%.

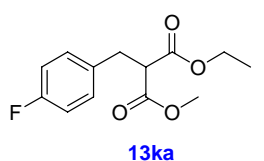

**2-(4-Fluoro-benzyl)-malonic acid ethyl ester methyl ester**

**(13ka):** Purified by column chromatography using EtOAc/hexane and isolated as oil. IR (neat):  $\nu_{\max}$  2986, 1736 (O-C=O), 1731 (O-C=O), 1512, 1441, 1275, 1266, 1225, 1154, 1030 and 755 cm<sup>-1</sup>; <sup>1</sup>H

NMR (CDCl<sub>3</sub>)  $\delta$  7.17-7.14 (2H, m), 6.96 (2H, br t, *J* = 8.8 Hz), 4.14 (2H, q, *J* = 6.8 Hz, OCH<sub>2</sub>CH<sub>3</sub>), 3.69 (3H, s, OCH<sub>3</sub>), 3.61 (1H, t, *J* = 7.6 Hz), 3.18 (2H, d, *J* = 8.0 Hz, OCH<sub>2</sub>Ar), 1.19 (3H, t, *J* = 7.2 Hz, OCH<sub>2</sub>CH<sub>3</sub>); <sup>13</sup>C NMR (CDCl<sub>3</sub>, DEPT-135)  $\delta$  169.2 (C, O-C=O), 168.6 (C, O-C=O), 161.8 (C, d, *J*<sub>C-F</sub> = 243.3 Hz, C-F), 133.5 (C, d, *J*<sub>C-F</sub> = 3.0 Hz), 130.3 (2 x CH, d, *J*<sub>C-F</sub> = 8.0 Hz), 115.3 (2 x CH, d, *J*<sub>C-F</sub> = 21.1 Hz), 61.6 (CH<sub>2</sub>, OCH<sub>2</sub>CH<sub>3</sub>), 53.8 (CH<sub>3</sub>, OCH<sub>3</sub>), 52.5 (CH), 33.9 (CH<sub>2</sub>, CH<sub>2</sub>Ar), 14.0 (CH<sub>3</sub>, OCH<sub>2</sub>CH<sub>3</sub>); LCMS: *m/z* 255.00 (M+H<sup>+</sup>), calcd C<sub>13</sub>H<sub>15</sub>FO<sub>4</sub> 254.10; Anal. calcd for C<sub>13</sub>H<sub>15</sub>FO<sub>4</sub> (254.10) : C, 61.41; H, 5.95. Found: C, 61.430; H, 5.889%.

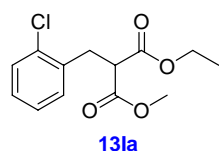

**2-(2-Chloro-benzyl)-malonic acid ethyl ester methyl ester (13la):**

Purified by column chromatography using EtOAc/hexane and isolated as oil. IR (neat):  $\nu_{\max}$  1731 (O-C=O), 1441, 1295, 1229, 1154 and 1036 cm<sup>-1</sup>; <sup>1</sup>H NMR (CDCl<sub>3</sub>)  $\delta$  7.33-7.31 (1H, m), 7.23-7.21 (1H, m),

7.17-7.11 (2H, m) [Ar-*H*]; 4.13 (2H, q, *J* = 6.8 Hz, OCH<sub>2</sub>CH<sub>3</sub>), 3.83 (1H, t, *J* = 8.0 Hz),

3.68 (3H, s, OCH<sub>3</sub>), 3.32 (2H, d, *J* = 7.6 Hz, CH<sub>2</sub>Ar), 1.17 (3H, t, *J* = 7.2 Hz, OCH<sub>2</sub>CH<sub>3</sub>); <sup>13</sup>C NMR (CDCl<sub>3</sub>, DEPT-135) δ 169.1 (C, O-C=O), 168.5 (C, O-C=O), 135.2 (C), 134.1 (C), 131.3 (CH), 129.5 (CH), 128.3 (CH), 126.7 (CH), 61.5 (CH<sub>2</sub>, OCH<sub>2</sub>CH<sub>3</sub>), 52.4 (CH<sub>3</sub>, OCH<sub>3</sub>), 51.2 (CH), 32.6 (CH<sub>2</sub>, CH<sub>2</sub>Ar), 13.9 (CH<sub>3</sub>, OCH<sub>2</sub>CH<sub>3</sub>); LCMS: *m/z* 269.00 (M-H<sup>+</sup>), calcd C<sub>13</sub>H<sub>15</sub>ClO<sub>4</sub> 270.07; Anal. calcd for C<sub>13</sub>H<sub>15</sub>ClO<sub>4</sub> (270.07): C, 57.68; H, 5.59. Found: C, 57.748; H, 5.507%.

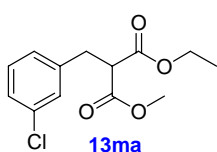

**2-(3-Chloro-benzyl)-malonic acid ethyl ester methyl ester (13ma):**

Purified by column chromatography using EtOAc/hexane and isolated as oil. IR (neat):  $\nu_{\max}$  1736 (O-C=O), 1731, 1438, 1339, 1291, 1229, 1153 and 1031 cm<sup>-1</sup>; <sup>1</sup>H NMR (CDCl<sub>3</sub>) δ 7.31–7.06 (4H, m) [Ar-*H*]; 4.13 (2H, q, *J* = 7.2 Hz, OCH<sub>2</sub>CH<sub>3</sub>), 3.68 (3H, s, OCH<sub>3</sub>), 3.61 (1H, t, *J* = 7.6 Hz), 3.16 (2H, d, *J* = 7.6 Hz, CH<sub>2</sub>Ar), 1.17 (3H, t, *J* = 7.2 Hz, OCH<sub>2</sub>CH<sub>3</sub>); <sup>13</sup>C NMR (CDCl<sub>3</sub>, DEPT-135) δ 169.0 (C, O-C=O), 168.4 (C, O-C=O), 139.8 (C), 134.2 (C), 129.8 (CH), 129.0 (CH), 127.02 (CH), 127.00 (CH), 61.6 (CH<sub>2</sub>, OCH<sub>2</sub>CH<sub>3</sub>), 53.4 (CH<sub>3</sub>, OCH<sub>3</sub>), 52.5 (CH), 34.3 (CH<sub>2</sub>, CH<sub>2</sub>Ar), 13.9 (CH<sub>3</sub>, OCH<sub>2</sub>CH<sub>3</sub>); LCMS: *m/z* 271.00 (M+H<sup>+</sup>), calcd C<sub>13</sub>H<sub>15</sub>ClO<sub>4</sub> 270.07; Anal. calcd for C<sub>13</sub>H<sub>15</sub>ClO<sub>4</sub> (270.07): C, 57.68; H, 5.59. Found: C, 57.634; H, 5.627%.

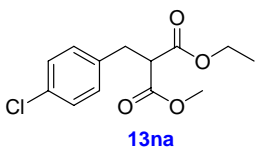

**2-(4-Chloro-benzyl)-malonic acid ethyl ester methyl ester (13na):**

Purified by column chromatography using EtOAc/hexane and isolated as oil. IR (neat):  $\nu_{\max}$  2985, 1736 (O-C=O), 1731 (O-C=O), 1275, 1230, 1152, 1095 and 754 cm<sup>-1</sup>; <sup>1</sup>H NMR (CDCl<sub>3</sub>) δ 7.22 (2H, dd, *J* = 6.8, 2.0 Hz), 7.14 (2H, dd, *J* = 6.8, 2.0 Hz) [Ar-*H*]; 4.14 (2H, dq, *J* = 7.2, 0.4 Hz, OCH<sub>2</sub>CH<sub>3</sub>), 3.69 (3H, s, OCH<sub>3</sub>), 3.61 (1H, t, *J* = 8.0 Hz), 3.17 (2H, d, *J* = 8.0 Hz, CH<sub>2</sub>Ar), 1.19 (3H, t, *J* = 7.2 Hz, OCH<sub>2</sub>CH<sub>3</sub>); <sup>13</sup>C NMR (CDCl<sub>3</sub>, DEPT-135) δ 169.0 (C, O-C=O), 168.4 (C, O-C=O), 136.2 (C), 132.6 (C), 130.2 (2 x CH), 128.6 (2 x CH), 61.6 (CH<sub>2</sub>, OCH<sub>2</sub>CH<sub>3</sub>), 53.5 (CH<sub>3</sub>, OCH<sub>3</sub>), 52.5 (CH), 34.0 (CH<sub>2</sub>, CH<sub>2</sub>Ar), 13.9 (CH<sub>3</sub>, OCH<sub>2</sub>CH<sub>3</sub>); LCMS: 271.00 *m/z* (M+H<sup>+</sup>), calcd C<sub>13</sub>H<sub>15</sub>ClO<sub>4</sub> 270.71; Anal. calcd for C<sub>13</sub>H<sub>15</sub>ClO<sub>4</sub> (270.71): C, 57.68; H, 5.59. Found: C, 57.593; H, 5.543%.

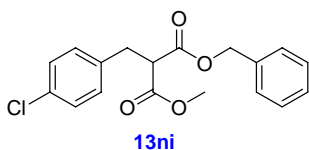

**2-(4-Chloro-benzyl)-malonic acid benzyl ester methyl ester (13ni):** Purified by column chromatography using EtOAc/hexane and isolated as

oil. IR (neat):  $\nu_{\max}$  2954, 1736 (O-C=O), 1731 (O-C=O), 1493, 1440, 1340, 1274, 1226, 1148, 1095, 1018, 910, 736 and 699  $\text{cm}^{-1}$ ;  $^1\text{H}$  NMR ( $\text{CDCl}_3$ )  $\delta$  7.35-7.33 (3H, m), 7.24-7.18 (4H, m), 7.10-7.08 (2H, m) [Ar-*H*]; 5.13 (2H, ABq,  $J = 13.6$  Hz,  $\text{OCH}_2\text{Ph}$ ), 3.68 (3H, s,  $\text{OCH}_3$ ), 3.67 (1H, t,  $J = 8.0$  Hz), 3.20 (2H, d,  $J = 8.4$  Hz,  $\text{CH}_2\text{Ar}$ );  $^{13}\text{C}$  NMR ( $\text{CDCl}_3$ , DEPT-135)  $\delta$  168.8 (C, O-C=O), 168.3 (C, O-C=O), 136.0 (C), 135.1 (C), 132.6 (C), 130.2 (2 x CH), 128.6 (2 x CH), 128.5 (2 x CH), 128.4 (CH), 128.1 (2 x CH), 67.2 ( $\text{CH}_2$ ,  $\text{OCH}_2\text{Ph}$ ), 53.5 ( $\text{CH}_3$ ,  $\text{OCH}_3$ ), 52.6 (CH), 34.0 ( $\text{CH}_2$ ,  $\text{CH}_2\text{Ar}$ ); LCMS:  $m/z$  333.00 ( $\text{M}+\text{H}^+$ ), calcd  $\text{C}_{18}\text{H}_{17}\text{ClO}_4$  332.08; Anal. calcd for  $\text{C}_{18}\text{H}_{17}\text{ClO}_4$  (332.08): C, 64.97; H, 5.15. Found: C, 65.037; H, 5.155%.

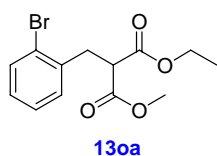

**2-(2-Bromo-benzyl)-malonic acid ethyl ester methyl ester (13oa):**

Purified by column chromatography using EtOAc/hexane and isolated as oil. IR (neat):  $\nu_{\max}$  1736 (C, O-C=O), 1731 (O-C=O), 1471, 1440, 1338, 1294, 1228, 1153, 1029 and 754  $\text{cm}^{-1}$ ;  $^1\text{H}$  NMR ( $\text{CDCl}_3$ )  $\delta$  7.50 (1H, d,  $J = 8.0$  Hz), 7.23-7.16 (2H, m), 7.08-7.04 (1H, m) [Ar-*H*]; 4.13 (2H, q,  $J = 7.2$  Hz,  $\text{OCH}_2\text{CH}_3$ ), 3.84 (1H, t,  $J = 8.0$  Hz), 3.67 (3H, s,  $\text{OCH}_3$ ), 3.32 (2H, d,  $J = 8.0$  Hz,  $\text{CH}_2\text{Ar}$ ), 1.17 (3H, t,  $J = 7.2$  Hz,  $\text{OCH}_2\text{CH}_3$ );  $^{13}\text{C}$  NMR ( $\text{CDCl}_3$ , DEPT-135)  $\delta$  169.0 (C, O-C=O), 168.4 (C, O-C=O), 136.9 (C), 132.8 (CH), 131.3 (CH), 128.5 (CH), 127.3 (CH), 124.4 (C), 61.4 ( $\text{CH}_2$ ,  $\text{OCH}_2\text{CH}_3$ ), 52.4 ( $\text{CH}_3$ ,  $\text{OCH}_3$ ), 51.3 (CH), 35.0 ( $\text{CH}_2$ ,  $\text{CH}_2\text{Ar}$ ), 13.9 ( $\text{CH}_3$ ,  $\text{OCH}_2\text{CH}_3$ ); LCMS:  $m/z$  313.00 ( $\text{M}-\text{H}^+$ ), calcd  $\text{C}_{13}\text{H}_{15}\text{BrO}_4$  314.02; Anal. calcd for  $\text{C}_{13}\text{H}_{15}\text{BrO}_4$  (314.02): C, 49.54; H, 4.80. Found: C, 49.561; H, 4.884%.

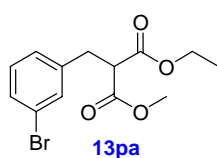

**2-(3-Bromo-benzyl)-malonic acid ethyl ester methyl ester (13pa):**

Purified by column chromatography using EtOAc/hexane and isolated as oil. IR (neat):  $\nu_{\max}$  2986, 1731 (O-C=O), 1438, 1339, 1272, 1229, 1152, 1030 and 753  $\text{cm}^{-1}$ ;  $^1\text{H}$  NMR ( $\text{CDCl}_3$ )  $\delta$  7.32 (2H, m), 7.13 (2H, m) [Ar-*H*]; 4.15 (2H, q,  $J = 7.2$  Hz,  $\text{OCH}_2\text{CH}_3$ ), 3.70 (3H, s,  $\text{OCH}_3$ ), 3.62 (1H, t,  $J = 8.0$  Hz), 3.17 (2H, d,  $J = 7.6$  Hz,  $\text{CH}_2\text{Ar}$ ), 1.19 (3H, t,  $J = 7.2$  Hz,  $\text{OCH}_2\text{CH}_3$ );  $^{13}\text{C}$  NMR ( $\text{CDCl}_3$ , DEPT-135)  $\delta$  169.0 (C, O-C=O), 168.4 (C, O-C=O), 140.1 (C), 131.9 (CH), 130.1 (CH), 129.9 (CH), 127.5 (CH), 122.5 (C), 61.7 ( $\text{CH}_2$ ,  $\text{OCH}_2\text{CH}_3$ ), 53.4 ( $\text{CH}_3$ ,  $\text{OCH}_3$ ), 52.6 (CH), 34.2 ( $\text{CH}_2$ ,  $\text{CH}_2\text{Ar}$ ), 14.0 ( $\text{CH}_3$ ,  $\text{OCH}_2\text{CH}_3$ ); LCMS:  $m/z$  315.00 ( $\text{M}+\text{H}^+$ ), calcd  $\text{C}_{13}\text{H}_{15}\text{BrO}_4$  314.02; Anal. calcd for  $\text{C}_{13}\text{H}_{15}\text{BrO}_4$  (314.02): C, 49.54; H, 4.80. Found: C, 49.428; H, 4.894%.

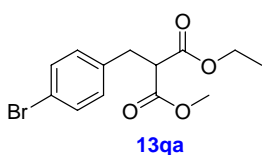

**2-(4-Bromo-benzyl)-malonic acid ethyl ester methyl ester**

**(13qa):** Purified by column chromatography using EtOAc/hexane and isolated as oil. IR (neat):  $\nu_{\max}$  1736 (O-C=O), 1731 (O-C=O), 1440, 1339, 1273, 1230, 1152, 1070, 1031 and 754  $\text{cm}^{-1}$ ;  $^1\text{H}$  NMR

( $\text{CDCl}_3$ )  $\delta$  7.36 (2H, td,  $J = 8.4, 2.0$  Hz), 7.05 (2H, td,  $J = 8.4, 2.0$  Hz) [Ar-H]; 4.12 (2H, dq,  $J = 7.2, 0.8$  Hz,  $\text{OCH}_2\text{CH}_3$ ), 3.66 (3H, s,  $\text{OCH}_3$ ), 3.60 (1H, t,  $J = 8.0$  Hz), 3.14 (2H, d,  $J = 8.0$  Hz,  $\text{CH}_2\text{Ar}$ ), 1.17 (3H, t,  $J = 7.2$  Hz,  $\text{OCH}_2\text{CH}_3$ );  $^{13}\text{C}$  NMR ( $\text{CDCl}_3$ , DEPT-135)  $\delta$  168.9 (C, O-C=O), 168.3 (C, O-C=O), 136.7 (C), 131.5 (2 x CH), 130.5 (2 x CH), 120.6 (C), 61.5 ( $\text{CH}_2$ ,  $\text{OCH}_2\text{CH}_3$ ), 53.3 ( $\text{CH}_3$ ,  $\text{OCH}_3$ ), 52.4 (CH), 33.9 ( $\text{CH}_2$ ,  $\text{CH}_2\text{Ar}$ ), 13.8 ( $\text{CH}_3$ ,  $\text{OCH}_2\text{CH}_3$ ); LCMS:  $m/z$  313.00 ( $\text{M-H}^+$ ), calcd  $\text{C}_{13}\text{H}_{15}\text{BrO}_4$  314.02; Anal. calcd for  $\text{C}_{13}\text{H}_{15}\text{BrO}_4$  (314.02): C, 49.54; H, 4.80. Found: C, 49.561; H, 4.763%.

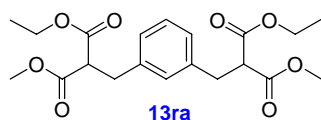

**2-[3-(2-Ethoxycarbonyl-2-methoxycarbonyl-ethyl)-benzyl]-malonic acid ethyl ester**

**methyl ester (13ra):** Purified by column chromatography using EtOAc/hexane and isolated as oil. IR (neat):  $\nu_{\max}$  2985, 1728 (O-C=O), 1441, 1369, 1338, 1276, 1228, 1151, 1031,

754 and 705  $\text{cm}^{-1}$ ;  $^1\text{H}$  NMR ( $\text{CDCl}_3$ )  $\delta$  7.17 (1H, t,  $J = 7.2$  Hz), 7.03 (2H, d,  $J = 8.0$  Hz), 7.02 (1H, s) [Ar-H]; 4.14 (4H, q,  $J = 6.8$  Hz, 2 x  $\text{OCH}_2\text{CH}_3$ ), 3.68 (6H, s, 2 x  $\text{OCH}_3$ ), 3.61 (2H, t,  $J = 8.0$  Hz), 3.16 (4H, d,  $J = 7.6$  Hz, 2 x  $\text{CH}_2\text{Ar}$ ), 1.18 (6H, t,  $J = 7.2$  Hz, 2 x  $\text{OCH}_2\text{CH}_3$ );  $^{13}\text{C}$  NMR ( $\text{CDCl}_3$ , DEPT-135)  $\delta$  169.2 (2 x C, O-C=O), 168.6 (2 x C, O-C=O), 138.1 (2 x C), 129.2 (CH), 128.6 (CH), 127.2 (2 x CH), 61.5 (2 x  $\text{CH}_2$ , 2 x  $\text{OCH}_2\text{CH}_3$ ), 53.6 (2 x  $\text{CH}_3$ , 2 x  $\text{OCH}_3$ ), 52.4 (2 x CH), 34.6 (2 x  $\text{CH}_2$ , 2 x  $\text{CH}_2\text{Ar}$ ), 13.9 (2 x  $\text{CH}_3$ , 2 x  $\text{OCH}_2\text{CH}_3$ ); LCMS:  $m/z$  393.00 ( $\text{M-H}^+$ ), calcd  $\text{C}_{20}\text{H}_{26}\text{O}_8$  394.16; Anal. calcd for  $\text{C}_{20}\text{H}_{26}\text{O}_8$  (394.16): C, 60.90; H, 6.64. Found: C, 61.050; H, 6.500%.

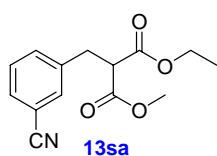

**2-(2-Cyano-benzyl)-malonic acid ethyl ester methyl ester (13sa):**

Purified by column chromatography using EtOAc/hexane and isolated as oil. IR (neat):  $\nu_{\max}$  2230 ( $\text{C}\equiv\text{N}$ ), 1736 (O-C=O), 1730 (O-C=O), 1440, 1368, 1338, 1294, 1228, 1153 and 1030  $\text{cm}^{-1}$ ;  $^1\text{H}$  NMR ( $\text{CDCl}_3$ )

$\delta$  7.50 (1H, d,  $J = 7.6$  Hz), 7.49 (1H, s), 7.44 (1H, d,  $J = 8.0$  Hz), 7.37 (1H, t,  $J = 8.0$  Hz) [Ar-H]; 4.14 (2H, q,  $J = 7.2$  Hz,  $\text{OCH}_2\text{CH}_3$ ), 3.69 (3H, s,  $\text{OCH}_3$ ), 3.62 (1H, t,  $J = 7.6$  Hz), 3.22 (2H, d,  $J = 7.6$  Hz,  $\text{CH}_2\text{Ar}$ ), 1.18 (3H, t,  $J = 7.2$  Hz,  $\text{OCH}_2\text{CH}_3$ );  $^{13}\text{C}$  NMR ( $\text{CDCl}_3$ , DEPT-135)  $\delta$  168.7 (C, O-C=O), 168.1 (C, O-C=O), 139.3 (C), 133.4 (CH), 132.3 (CH),



130.5 (CH), 129.3 (CH), 118.5 (C), 112.5 (C, C≡N), 61.7 (CH<sub>2</sub>, OCH<sub>2</sub>CH<sub>3</sub>), 53.0 (CH<sub>3</sub>, OCH<sub>3</sub>), 52.6 (CH), 34.0 (CH<sub>2</sub>, CH<sub>2</sub>Ar), 13.9 (CH<sub>3</sub>, OCH<sub>2</sub>CH<sub>3</sub>); LCMS: m/z 260.00 (M-H<sup>+</sup>), calcd C<sub>14</sub>H<sub>15</sub>NO<sub>4</sub> 261.10; Anal. calcd for C<sub>14</sub>H<sub>15</sub>NO<sub>4</sub> (261.10): C, 64.36; H, 5.79; N, 5.36. Found: C, 64.469; H, 5.735; N, 5.406%.

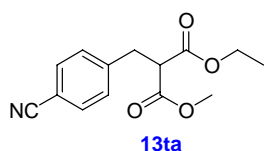

**2-(4-Cyano-benzyl)-malonic acid ethyl ester methyl ester**

**(13ta):** Purified by column chromatography using EtOAc/hexane and isolated as oil. IR (neat):  $\nu_{\max}$  3224, 2229 (C≡N), 1736 (O-C=O), 1731 (O-C=O), 1440, 1292, 1232, 1154 and 1028 cm<sup>-1</sup>; <sup>1</sup>H

NMR (CDCl<sub>3</sub>)  $\delta$  7.56 (2H, d,  $J$  = 8.0 Hz), 7.31 (2H, d,  $J$  = 8.0 Hz), 4.13 (2H, q,  $J$  = 7.2 Hz, OCH<sub>2</sub>CH<sub>3</sub>), 3.68 (3H, s, OCH<sub>3</sub>), 3.64 (1H, t,  $J$  = 8.0 Hz), 3.24 (2H, d,  $J$  = 8.0 Hz, CH<sub>2</sub>Ar), 1.18 (3H, t,  $J$  = 7.2 Hz, OCH<sub>2</sub>CH<sub>3</sub>); <sup>13</sup>C NMR (CDCl<sub>3</sub>, DEPT-135)  $\delta$  168.7 (C, O-C=O), 168.1 (C, O-C=O), 143.3 (C), 132.2 (2 x CH), 129.6 (2 x CH), 118.6 (C), 110.7 (C, C≡N), 61.7 (CH<sub>2</sub>, OCH<sub>2</sub>CH<sub>3</sub>), 52.9 (CH<sub>3</sub>, OCH<sub>3</sub>), 52.6 (CH), 34.5 (CH<sub>2</sub>, CH<sub>2</sub>Ar), 13.9 (CH<sub>3</sub>, OCH<sub>2</sub>CH<sub>3</sub>); LCMS: m/z 260.00 (M-H<sup>+</sup>), calcd C<sub>14</sub>H<sub>15</sub>NO<sub>4</sub> 261.10; Anal. calcd for C<sub>14</sub>H<sub>15</sub>NO<sub>4</sub> (261.10): C, 64.36; H, 5.79; N, 5.36. Found: C, 64.361; H, 5.820; N, 5.644%.

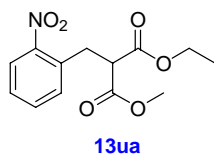

**2-(2-Nitro-benzyl)-malonic acid ethyl ester methyl ester (13ua):**

Purified by column chromatography using EtOAc/hexane and isolated as oil. IR (neat):  $\nu_{\max}$  1736 (O-C=O), 1731 (O-C=O), 1528, 1441, 1348, 1295, 1230, 1159, 1028, 858 and 789 cm<sup>-1</sup>; <sup>1</sup>H NMR (CDCl<sub>3</sub>)  $\delta$

7.96 (1H, d,  $J$  = 8.0 Hz), 7.51 (1H, t,  $J$  = 7.6 Hz), 7.39 (1H, t,  $J$  = 8.0 Hz), 7.36 (1H, d,  $J$  = 7.6 Hz) [Ar-H]; 4.12 (2H, q,  $J$  = 7.2 Hz, OCH<sub>2</sub>CH<sub>3</sub>), 3.86 (1H, t,  $J$  = 8.0 Hz), 3.67 (3H, s, OCH<sub>3</sub>), 3.48 (2H, dd,  $J$  = 7.2, 2.0 Hz, CH<sub>2</sub>Ar), 1.16 (3H, t,  $J$  = 7.2 Hz, OCH<sub>2</sub>CH<sub>3</sub>); <sup>13</sup>C NMR (CDCl<sub>3</sub>, DEPT-135)  $\delta$  168.9 (C, O-C=O), 168.3 (C, O-C=O), 149.1 (C), 133.2 (CH), 132.9 (CH), 132.9 (C), 128.2 (CH), 125.1 (CH), 61.6 (CH<sub>2</sub>, OCH<sub>2</sub>CH<sub>3</sub>), 52.5 (CH<sub>3</sub>, OCH<sub>3</sub>), 52.1 (CH), 32.1 (CH<sub>2</sub>, CH<sub>2</sub>Ar), 13.8 (CH<sub>3</sub>, OCH<sub>2</sub>CH<sub>3</sub>); LCMS: m/z 282.00 (M+H<sup>+</sup>), calcd C<sub>13</sub>H<sub>15</sub>NO<sub>6</sub> 281.09; Anal. calcd for C<sub>13</sub>H<sub>15</sub>NO<sub>6</sub> (281.09): C, 55.51; H, 5.38; N, 4.98. Found: C, 55.638; H, 5.416; N, 4.951%.



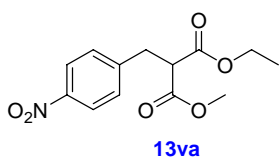

**2-(4-Nitro-benzyl)-malonic acid ethyl ester methyl ester**

**(13va):** Purified by column chromatography using EtOAc/hexane and isolated as oil. IR (neat):  $\nu_{\max}$  1736 (O-C=O), 1731 (O-C=O), 1603, 1521, 1347, 1232, 1199, 1154, 1109, 1030 and 856  $\text{cm}^{-1}$ ;  $^1\text{H}$  NMR ( $\text{CDCl}_3$ )  $\delta$  8.11 (2H, d,  $J = 8.4$  Hz), 7.36 (2H, d,  $J = 8.8$  Hz) [Ar-*H*]; 4.14 (2H, dq,  $J = 7.2, 2.0$  Hz,  $\text{OCH}_2\text{CH}_3$ ), 3.68 (3H, s,  $\text{OCH}_3$ ), 3.66 (1H, t,  $J = 8.0$  Hz), 3.29 (2H, d,  $J = 7.6$  Hz,  $\text{CH}_2\text{Ar}$ ), 1.18 (3H, t,  $J = 7.2$  Hz,  $\text{OCH}_2\text{CH}_3$ );  $^{13}\text{C}$  NMR ( $\text{CDCl}_3$ , DEPT-135)  $\delta$  168.6 (C, O-C=O), 168.0 (C, O-C=O), 146.9 (C), 145.4 (C), 129.7 (2 x CH), 123.6 (2 x CH), 61.8 ( $\text{CH}_2$ ,  $\text{OCH}_2\text{CH}_3$ ), 52.9 ( $\text{CH}_3$ ,  $\text{OCH}_3$ ), 52.6 (CH), 34.2 ( $\text{CH}_2$ ,  $\text{CH}_2\text{Ar}$ ), 13.9 ( $\text{CH}_3$ ,  $\text{OCH}_2\text{CH}_3$ ); LCMS:  $m/z$  282.00 ( $\text{M}+\text{H}^+$ ), calcd  $\text{C}_{13}\text{H}_{15}\text{NO}_6$  281.09; Anal. calcd for  $\text{C}_{13}\text{H}_{15}\text{NO}_6$  (281.09): C, 55.51; H, 5.38; N, 4.98. Found: C, 55.518; H, 5.288; N, 4.928%.

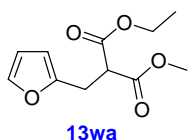

**2-Furan-2-ylmethyl-malonic acid ethyl ester methyl ester (13wa):**

Purified by column chromatography using EtOAc/hexane and isolated as oil. IR (neat):  $\nu_{\max}$  2986, 1736 (O-C=O), 1731 (O-C=O), 1275, 1266, 1218, 1150 and 752  $\text{cm}^{-1}$ ;  $^1\text{H}$  NMR ( $\text{CDCl}_3$ )  $\delta$  7.28 (1H, s), 6.24 (1H, t,  $J = 2.4$  Hz), 6.04 (1H, d,  $J = 3.2$  Hz) [Ar-*H*]; 4.18 (2H, q,  $J = 7.2$  Hz,  $\text{OCH}_2\text{CH}_3$ ), 3.72 (1H, t,  $J = 8.0$  Hz), 3.71 (3H, s,  $\text{OCH}_3$ ), 3.24 (2H, d,  $J = 8.0$  Hz), 1.22 (3H, t,  $J = 7.2$  Hz,  $\text{OCH}_2\text{CH}_3$ );  $^{13}\text{C}$  NMR ( $\text{CDCl}_3$ , DEPT-135)  $\delta$  169.0 (C, O-C=O), 168.4 (C, O-C=O), 151.5 (C), 141.6 (CH), 110.2 (CH), 106.6 (CH), 61.6 ( $\text{CH}_2$ ,  $\text{OCH}_2\text{CH}_3$ ), 52.6 ( $\text{CH}_3$ ,  $\text{OCH}_3$ ), 50.9 (CH), 27.3 ( $\text{CH}_2$ ,  $\text{CH}_2\text{Ar}$ ), 13.9 ( $\text{CH}_3$ ,  $\text{OCH}_2\text{CH}_3$ ); LCMS:  $m/z$  227.00 ( $\text{M}+\text{H}^+$ ), calcd  $\text{C}_{11}\text{H}_{14}\text{O}_5$  226.08; Anal. calcd for  $\text{C}_{11}\text{H}_{14}\text{O}_5$  (226.08): C, 58.40; H, 6.24. Found: C, 58.395; H 6.229%.

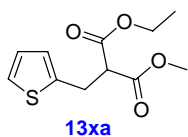

**2-Thiophen-2-ylmethyl-malonic acid ethyl ester methyl ester (13xa):**

Purified by column chromatography using EtOAc/hexane and isolated as oil. IR (neat):  $\nu_{\max}$  2986, 1731 (O-C=O), 1438, 1369, 1336, 1272, 1223, 1156, 1035, 752 and 702  $\text{cm}^{-1}$ ;  $^1\text{H}$  NMR ( $\text{CDCl}_3$ )  $\delta$  7.13 (1H, d,  $J = 5.2$  Hz), 6.89 (1H, t,  $J = 4.8$  Hz), 6.83 (1H, d,  $J = 2.8$  Hz) [Ar-*H*]; 4.18 (2H, q,  $J = 7.2$  Hz,  $\text{OCH}_2\text{CH}_3$ ), 3.72 (3H, s,  $\text{OCH}_3$ ), 3.67 (1H, t,  $J = 7.6$  Hz), 3.43 (2H, d,  $J = 7.6$  Hz), 1.23 (3H, t,  $J = 6.8$  Hz,  $\text{OCH}_2\text{CH}_3$ );  $^{13}\text{C}$  NMR ( $\text{CDCl}_3$ , DEPT-135)  $\delta$  168.8 (C, O-C=O), 168.3 (C, O-C=O), 139.8 (C), 126.8 (CH), 125.9 (CH), 124.2 (CH), 61.6 ( $\text{CH}_2$ ,

OCH<sub>2</sub>CH<sub>3</sub>), 54.0 (CH<sub>3</sub>, OCH<sub>3</sub>), 52.5 (CH), 28.9 (CH<sub>2</sub>, CH<sub>2</sub>Ar), 13.9 (CH<sub>3</sub>, OCH<sub>2</sub>CH<sub>3</sub>); LCMS: m/z 242.00 (M<sup>+</sup>), calcd C<sub>11</sub>H<sub>14</sub>O<sub>4</sub>S 242.06; Anal. calcd for C<sub>11</sub>H<sub>14</sub>O<sub>4</sub>S (242.06): C, 54.53; H, 5.82. Found: C, 54.597; H, 5.881%.

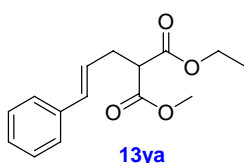

13ya

**2-(3-Phenyl-allyl)-malonic acid ethyl ester methyl ester (13ya):**

Purified by column chromatography using EtOAc/hexane and isolated as oil. IR (neat):  $\nu_{\max}$  2985, 1736 (O-C=O), 1731 (O-C=O), 1439, 1275, 1266, 1154, 1030, 968, 752 and 697 cm<sup>-1</sup>; <sup>1</sup>H NMR (CDCl<sub>3</sub>)  $\delta$  7.33-7.21 (5H, m, Ph-H), 6.48 (1H, d, *J* = 16.0 Hz), 6.17 (1H, m) [Ph-CH=CH-CH<sub>2</sub>]; 4.20 (2H, q, *J* = 8.0 Hz, OCH<sub>2</sub>CH<sub>3</sub>), 3.75 (3H, s, OCH<sub>3</sub>), 3.52 (1H, t, *J* = 8.0 Hz), 2.81 (2H, t, *J* = 8.0 Hz), 1.26 (3H, t, *J* = 8.0 Hz, OCH<sub>2</sub>CH<sub>3</sub>); <sup>13</sup>C NMR (CDCl<sub>3</sub>, DEPT-135)  $\delta$  169.4 (C, O-C=O), 168.8 (C, O-C=O), 137.0 (C), 132.9 (CH), 128.5 (2 x CH), 127.4 (CH), 126.2 (2 x CH), 125.5 (CH), 61.5 (CH<sub>2</sub>, OCH<sub>2</sub>CH<sub>3</sub>), 52.5 (CH<sub>3</sub>, OCH<sub>3</sub>), 51.9 (CH), 32.2 (CH<sub>2</sub>, CH<sub>2</sub>CH=CHPh), 14.1 (CH<sub>3</sub>, OCH<sub>2</sub>CH<sub>3</sub>); LCMS: m/z 263.00 (M+H<sup>+</sup>), calcd C<sub>15</sub>H<sub>18</sub>O<sub>4</sub> 262.12; Anal. calcd for C<sub>15</sub>H<sub>18</sub>O<sub>4</sub> (262.12): C, 68.68; H, 6.92. Found: C, 68.708; H, 6.964%.

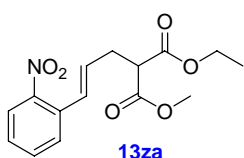

13za

**2-[3-(2-Nitro-phenyl)-allyl]-malonic acid ethyl ester methyl ester (13za):**

Purified by column chromatography using EtOAc/hexane and isolated as oil. IR (neat):  $\nu_{\max}$  2986, 1736 (O-C=O), 1731 (O-C=O), 1524, 1439, 1347, 1275, 1267, 1157, 1031, 967, 858, 751 and 640 cm<sup>-1</sup>; <sup>1</sup>H NMR (CDCl<sub>3</sub>)  $\delta$  7.90 (1H, d, *J* = 8.0 Hz), 7.54 (2H, d, *J* = 4.0 Hz), 7.38 (1H, m), 6.94 (1H, d, *J* = 16.0 Hz), 6.18 (1H, td, *J* = 14.3, 7.0 Hz) [Ar-H]; 4.23 (2H, q, *J* = 8.0 Hz, OCH<sub>2</sub>CH<sub>3</sub>), 3.77 (3H, s, OCH<sub>3</sub>), 3.57 (1H, t, *J* = 8.0 Hz), 2.86 (2H, t, *J* = 8.0 Hz), 1.28 (3H, t, *J* = 8.0 Hz, OCH<sub>2</sub>CH<sub>3</sub>); <sup>13</sup>C NMR (CDCl<sub>3</sub>, DEPT-135)  $\delta$  169.1 (C, O-C=O), 168.6 (C, O-C=O), 147.6 (C), 133.0 (CH), 132.7 (C), 131.2 (CH), 128.8 (CH), 128.2 (CH), 128.0 (CH), 124.4 (CH), 61.7 (CH<sub>2</sub>, OCH<sub>2</sub>CH<sub>3</sub>), 52.6 (CH<sub>3</sub>, OCH<sub>3</sub>), 51.5 (CH), 32.2 (CH<sub>2</sub>, CH<sub>2</sub>CH=CHAr), 14.0 (CH<sub>3</sub>, OCH<sub>2</sub>CH<sub>3</sub>); LCMS: m/z 306.00 (M-H<sup>+</sup>), calcd C<sub>15</sub>H<sub>17</sub>NO<sub>6</sub> 307.11; Anal. calcd for C<sub>15</sub>H<sub>17</sub>NO<sub>6</sub> (307.11): C, 58.63; H, 5.58; N, 4.56. Found: C, 58.619; H, 5.516; N, 4.666%.

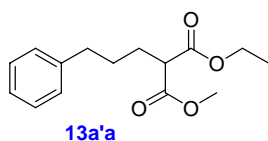

13a'a

**2-(3-Phenyl-propyl)-malonic acid ethyl ester methyl ester (13a'a):**

Purified by column chromatography using EtOAc/hexane and isolated as oil. IR (neat):  $\nu_{\max}$  2985, 1736 (O-C=O), 1731 (O-C=O),

1443, 1272, 1148, 752, 701 and 645  $\text{cm}^{-1}$ ;  $^1\text{H}$  NMR ( $\text{CDCl}_3$ )  $\delta$  7.28 (2H, t,  $J = 7.6$  Hz), 7.18 (1H, t,  $J = 6.8$  Hz), 7.17 (2H, d,  $J = 8.0$  Hz) [Ar- $H$ ]; 4.19 (2H, q,  $J = 7.2$  Hz,  $\text{OCH}_2\text{CH}_3$ ), 3.72 (3H, s,  $\text{OCH}_3$ ), 3.37 (1H, t,  $J = 7.6$  Hz,  $\text{PhCH}_2\text{CH}_2\text{CH}_2\text{CHE}_2$ ), 2.65 (2H, t,  $J = 7.6$  Hz,  $\text{PhCH}_2\text{CH}_2\text{CH}_2\text{CHE}_2$ ), 1.96 (2H, q,  $J = 7.6$  Hz,  $\text{PhCH}_2\text{CH}_2\text{CH}_2\text{CHE}_2$ ), 1.67 (2H, quintet,  $J = 8.0$  Hz,  $\text{PhCH}_2\text{CH}_2\text{CH}_2\text{CHE}_2$ ), 1.26 (3H, t,  $J = 7.2$  Hz,  $\text{OCH}_2\text{CH}_3$ );  $^{13}\text{C}$  NMR ( $\text{CDCl}_3$ , DEPT-135)  $\delta$  169.8 (C, O-C=O), 169.2 (C, O-C=O), 141.5 (C), 128.2 (4 x CH), 125.8 (CH), 61.3 ( $\text{CH}_2$ ,  $\text{OCH}_2\text{CH}_3$ ), 52.3 ( $\text{CH}_3$ ,  $\text{OCH}_3$ ), 51.6 (CH,  $\text{PhCH}_2\text{CH}_2\text{CH}_2\text{CHE}_2$ ), 35.3 ( $\text{CH}_2$ ,  $\text{PhCH}_2\text{CH}_2\text{CH}_2\text{CHE}_2$ ), 29.0 ( $\text{CH}_2$ ,  $\text{PhCH}_2\text{CH}_2\text{CH}_2\text{CHE}_2$ ), 28.3 ( $\text{CH}_2$ ,  $\text{PhCH}_2\text{CH}_2\text{CH}_2\text{CHE}_2$ ), 13.9 ( $\text{CH}_3$ ,  $\text{OCH}_2\text{CH}_3$ ); LCMS:  $m/z$  265.00 ( $\text{M}+\text{H}^+$ ), calcd  $\text{C}_{15}\text{H}_{20}\text{O}_4$  264.14; Anal. calcd for  $\text{C}_{15}\text{H}_{20}\text{O}_4$  (264.14): C, 68.16; H, 7.63. Found: C, 68.267; H, 7.591%.

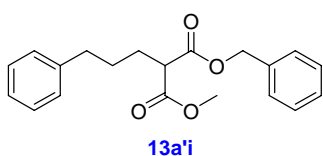

**2-(3-Phenyl-propyl)-malonic acid benzyl ester methyl ester (13a'i) and 2-(3-Phenyl-propyl)-malonic acid dimethyl ester (13a'b):** Purified by column chromatography

using EtOAc/hexane and isolated as oil. IR (neat):  $\nu_{\text{max}}$  2950, 1731 (O-C=O), 1453, 1291, 1213, 1146, 737 and  $699\text{cm}^{-1}$ ;  $^1\text{H}$  NMR ( $\text{CDCl}_3$ , 6:1 ratio of compounds **13a'i** and **13a'b**, major compound **13a'i**)  $\delta$  7.40-7.16 (10H, m) [Ar- $H$ ]; 5.21 (2H, s,  $\text{OCH}_2\text{Ph}$ ), 3.72 (3H, s,  $\text{OCH}_3$ ), 3.47 (1H, t,  $J = 8.0$  Hz,  $\text{PhCH}_2\text{CH}_2\text{CH}_2\text{CHE}_2$ ), 2.66 (2H, t,  $J = 8.0$  Hz,  $\text{PhCH}_2\text{CH}_2\text{CH}_2\text{CHE}_2$ ), 2.01 (2H, q,  $J = 8.0$  Hz,  $\text{PhCH}_2\text{CH}_2\text{CH}_2\text{CHE}_2$ ), 1.70 (2H, quintet,  $J = 8.0$  Hz,  $\text{PhCH}_2\text{CH}_2\text{CH}_2\text{CHE}_2$ );  $^{13}\text{C}$  NMR ( $\text{CDCl}_3$ , DEPT-135, 6:1 ratio of compounds **13a'i** and **13a'b**, major compound **13a'i**)  $\delta$  169.5 (C, O-C=O), 169.0 (C, O-C=O), 141.4 (C), 135.4 (C), 128.4 (2 x CH), 128.2 (5 x CH), 128.0 (2 x CH), 125.8 (CH), 66.9 ( $\text{CH}_2$ ,  $\text{OCH}_2\text{Ph}$ ), 52.2 ( $\text{CH}_3$ ,  $\text{OCH}_3$ ), 51.6 (CH,  $\text{PhCH}_2\text{CH}_2\text{CH}_2\text{CHE}_2$ ), 35.3 ( $\text{CH}_2$ ,  $\text{PhCH}_2\text{CH}_2\text{CH}_2\text{CHE}_2$ ), 28.9 ( $\text{CH}_2$ ,  $\text{PhCH}_2\text{CH}_2\text{CH}_2\text{CHE}_2$ ), 28.3 ( $\text{CH}_2$ ,  $\text{PhCH}_2\text{CH}_2\text{CH}_2\text{CHE}_2$ ); LCMS:  $m/z$  325.00 ( $\text{M}-\text{H}^+$ ), calcd  $\text{C}_{20}\text{H}_{22}\text{O}_4$  326.15.

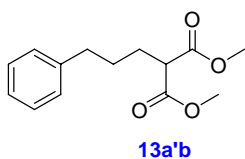

$^1\text{H}$  NMR ( $\text{CDCl}_3$ , 6:1 ratio of compounds **13a'i** and **13a'b**, minor compound **13a'b**)  $\delta$  7.40-7.16 (5H, m) [Ar- $H$ ]; 3.75 (6H, s,  $\text{OCH}_3$ ), 3.43 (1H, t,  $J = 7.6$  Hz), 2.68 (2H, t,  $J = 8.0$  Hz), 2.04-1.98 (2H, m), 1.72-1.66 (2H, m);  $^{13}\text{C}$  NMR ( $\text{CDCl}_3$ , DEPT-135, 6:1 ratio of compounds **13a'i** and **13a'b**, minor compound **13a'b**)  $\delta$  169.6 (2 x C, O-C=O), 141.4

(C), 128.2 (4 x CH), 125.8 (CH), 52.3 (2 x CH<sub>3</sub>, 2 x OCH<sub>3</sub>), 51.4 (CH, PhCH<sub>2</sub>CH<sub>2</sub>CH<sub>2</sub>CHE<sub>2</sub>), 35.3 (CH<sub>2</sub>, PhCH<sub>2</sub>CH<sub>2</sub>CH<sub>2</sub>CHE<sub>2</sub>), 28.9 (CH<sub>2</sub>, PhCH<sub>2</sub>CH<sub>2</sub>CH<sub>2</sub>CHE<sub>2</sub>), 28.3 (CH<sub>2</sub>, PhCH<sub>2</sub>CH<sub>2</sub>CH<sub>2</sub>CHE<sub>2</sub>).

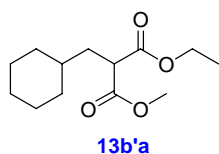

**2-Cyclohexylmethyl-malonic acid ethyl ester methyl ester (13b'a):**

Purified by column chromatography using EtOAc/hexane and isolated as oil. IR (neat):  $\nu_{\max}$  2925, 2851, 1737 (O-C=O), 1732 (O-C=O), 1445, 1275, 1196, 1153, 753 and 648 cm<sup>-1</sup>; <sup>1</sup>H NMR (CDCl<sub>3</sub>)  $\delta$  4.16 (2H, q,  $J$  = 7.2 Hz, OCH<sub>2</sub>CH<sub>3</sub>), 3.70 (3H, s, OCH<sub>3</sub>), 3.43 (1H, t,  $J$  = 7.6 Hz), 1.76 (2H, t,  $J$  = 7.2 Hz), 1.69-1.59 (5H, m), 1.23 (3H, t,  $J$  = 6.8 Hz, OCH<sub>2</sub>CH<sub>3</sub>), 1.19-1.08 (4H, m), 0.91-0.85 (2H, m); <sup>13</sup>C NMR (CDCl<sub>3</sub>, DEPT-135)  $\delta$  170.2 (C, O-C=O), 169.6 (C, O-C=O), 61.2 (CH<sub>2</sub>, OCH<sub>2</sub>CH<sub>3</sub>), 52.3 (CH<sub>3</sub>, OCH<sub>3</sub>), 49.4 (CH), 36.1 (CH<sub>2</sub>), 35.5 (CH), 32.82 (CH<sub>2</sub>), 32.76 (CH<sub>2</sub>), 26.3 (CH<sub>2</sub>), 26.0 (2 x CH<sub>2</sub>), 14.0 (CH<sub>3</sub>, OCH<sub>2</sub>CH<sub>3</sub>); LCMS:  $m/z$  243.00 (M+H<sup>+</sup>), calcd C<sub>13</sub>H<sub>22</sub>O<sub>4</sub> 242.15; Anal. calcd for C<sub>13</sub>H<sub>22</sub>O<sub>4</sub> (242.15): C, 64.44; H, 9.15. Found: C, 64.551; H, 9.136%.

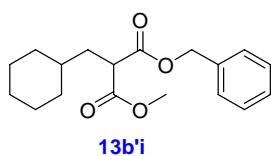

**2-Cyclohexylmethyl-malonic acid benzyl ester methyl ester (13b'i) and 2-Cyclohexylmethyl-malonic acid dimethyl ester (13b'b):**

Purified by column chromatography using EtOAc/hexane and isolated as oil. IR (neat):  $\nu_{\max}$  2924, 2850, 1736 (O-C=O), 1447, 1287, 1217, 1152, 1013 and 697 cm<sup>-1</sup>; <sup>1</sup>H NMR (CDCl<sub>3</sub>, 6:1 ratio of compounds **13b'i** and **13b'b**, major compound **13b'i**)  $\delta$  7.36-7.30 (5H, m) [Ar-H]; 5.16 (2H, s, OCH<sub>2</sub>Ph), 3.68 (3H, s, OCH<sub>3</sub>), 3.51 (1H, t,  $J$  = 7.6 Hz), 1.83-1.78 (2H, m), 1.70-1.64 (5H, m), 1.20-1.11 (4H, m), 0.90-0.85 (2H, m); <sup>13</sup>C NMR (CDCl<sub>3</sub>, DEPT-135, 6:1 ratio of compounds **13b'i** and **13b'b**, major compound **13b'i**)  $\delta$  170.1 (C, O-C=O), 169.5 (C, O-C=O), 135.6 (C), 128.5 (2 x CH), 128.3 (CH), 128.1 (2 x CH), 66.9 (CH<sub>2</sub>, OCH<sub>2</sub>Ph), 52.4 (CH<sub>3</sub>, OCH<sub>3</sub>), 49.5 (CH), 36.1 (CH<sub>2</sub>), 35.4 (CH), 33.0 (CH<sub>2</sub>), 32.7 (CH<sub>2</sub>), 26.4 (CH<sub>2</sub>), 26.05 (CH<sub>2</sub>), 26.02 (CH<sub>2</sub>); LCMS:  $m/z$  303.00 (M-H<sup>+</sup>), calcd C<sub>18</sub>H<sub>24</sub>O<sub>4</sub> 304.17.

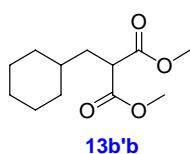

<sup>1</sup>H NMR (CDCl<sub>3</sub>, 6:1 ratio of compounds **13b'i** and **13b'b**, minor compound **13b'b**)  $\delta$  3.71 (6H, s, 2 x OCH<sub>3</sub>), 3.48 (1H, t,  $J$  = 7.6 Hz), 1.83-1.78 (2H, m), 1.70-1.64 (5H, m), 1.20-1.11 (4H, m), 0.90-0.85 (2H, m); <sup>13</sup>C NMR (CDCl<sub>3</sub>, DEPT-135, 6:1 ratio of compounds **13b'i** and **13b'b**, minor

compound **13b'b**)  $\delta$  170.2 (2 x C, 2 x O-C=O), 52.4 (2 x CH<sub>3</sub>, 2 x OCH<sub>3</sub>), 49.3 (CH), 36.2 (CH<sub>2</sub>), 35.5 (CH), 32.9 (2 x CH<sub>2</sub>), 26.4 (CH<sub>2</sub>), 26.05 (CH<sub>2</sub>), 26.02 (CH<sub>2</sub>).

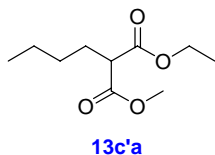

**2-Butyl-malonic acid ethyl ester methyl ester (13c'a):** Purified by column chromatography using EtOAc/hexane and isolated as oil. IR (neat):  $\nu_{\max}$  2958, 2934, 2866, 1737 (O-C=O), 1732 (O-C=O), 1441, 1371, 1337, 1271, 1220, 1155, 1118 and 1032 cm<sup>-1</sup>; <sup>1</sup>H NMR (CDCl<sub>3</sub>)

$\delta$  4.15 (2H, q,  $J = 7.2$  Hz, OCH<sub>2</sub>CH<sub>3</sub>), 3.69 (3H, s, OCH<sub>3</sub>), 3.29 (1H, t,  $J = 7.6$  Hz), 1.86 (2H, q,  $J = 7.6$  Hz), 1.31-1.20 (4H, m), 1.22 (3H, t,  $J = 7.6$  Hz), 0.85 (3H, t,  $J = 6.8$  Hz); <sup>13</sup>C NMR (CDCl<sub>3</sub>, DEPT-135)  $\delta$  170.0 (C, O-C=O), 169.4 (C, O-C=O), 61.2 (CH<sub>2</sub>, OCH<sub>2</sub>CH<sub>3</sub>), 52.2 (CH<sub>3</sub>, OCH<sub>3</sub>), 51.8 (CH), 29.4 (CH<sub>2</sub>), 28.4 (CH<sub>2</sub>), 22.3 (CH<sub>2</sub>), 14.0 (CH<sub>3</sub>), 13.7 (CH<sub>3</sub>); LCMS:  $m/z$  203.00 (M+H<sup>+</sup>), calcd C<sub>10</sub>H<sub>18</sub>O<sub>4</sub> 202.12; Anal. calcd for C<sub>10</sub>H<sub>18</sub>O<sub>4</sub> (202.12): C, 59.39; H, 8.97. Found: C, 59.349; H, 9.039%.

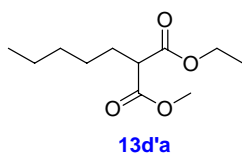

**2-Pentyl-malonic acid ethyl ester methyl ester (13d'a):** Purified by column chromatography using EtOAc/hexane and isolated as oil. IR (neat):  $\nu_{\max}$  2958, 2932, 2866, 1737 (O-C=O), 1441, 1338, 1271, 1221, 1155, 1118, 1032 and 754 cm<sup>-1</sup>; <sup>1</sup>H NMR (CDCl<sub>3</sub>)  $\delta$  4.19

(2H, q,  $J = 6.8$  Hz, OCH<sub>2</sub>CH<sub>3</sub>), 3.73 (3H, s, OCH<sub>3</sub>), 3.33 (1H, t,  $J = 7.6$  Hz), 1.88 (2H, m), 1.33-1.25 (6H, m), 1.26 (3H, t,  $J = 7.2$  Hz), 0.88 (3H, t,  $J = 7.2$  Hz, OCH<sub>2</sub>CH<sub>3</sub>); <sup>13</sup>C NMR (CDCl<sub>3</sub>, DEPT-135)  $\delta$  170.1 (C, O-C=O), 169.5 (C, O-C=O), 61.3 (CH<sub>2</sub>, OCH<sub>2</sub>CH<sub>3</sub>), 52.3 (CH<sub>3</sub>, OCH<sub>3</sub>), 51.9 (CH), 31.4 (CH<sub>2</sub>), 28.8 (CH<sub>2</sub>), 27.0 (CH<sub>2</sub>), 22.3 (CH<sub>2</sub>), 14.1 (CH<sub>3</sub>), 13.9 (CH<sub>3</sub>); LCMS:  $m/z$  215.00 (M-H<sup>+</sup>), calcd C<sub>11</sub>H<sub>20</sub>O<sub>4</sub> 216.14; Anal. calcd for C<sub>11</sub>H<sub>20</sub>O<sub>4</sub> (216.14): C, 61.09; H, 9.32. Found: C, 61.183; H, 9.307%.

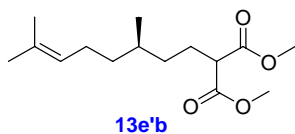

**(-)-2-(3,7-Dimethyl-oct-6-enyl)-malonic acid dimethyl ester (13e'b):** Purified by column chromatography using EtOAc/hexane and isolated as oil.  $[\alpha]_D^{25} = -2.656^\circ$  ( $c = 1.0$  g/100 mL, CHCl<sub>3</sub>, 90% ee); IR (neat):  $\nu_{\max}$  2958, 2923, 2874,

1738 (O-C=O), 1439, 1378, 1346, 1233, 1155 and 1020 cm<sup>-1</sup>; <sup>1</sup>H NMR (CDCl<sub>3</sub>)  $\delta$  5.06 (1H, br s, C=CH), 3.72 (6H, s, 2 x OCH<sub>3</sub>), 3.30 (1H, t,  $J = 7.6$  Hz), 1.96-1.88 (4H, m), 1.66 (3H, s, CH<sub>3</sub>), 1.58 (3H, s, CH<sub>3</sub>), 1.50-1.20 (3H, m), 1.20-1.00 (2H, m), 0.87 (3H, d,  $J = 6.4$  Hz, CHCH<sub>3</sub>); <sup>13</sup>C NMR (CDCl<sub>3</sub>, DEPT-135)  $\delta$  169.93 (C, O-C=O), 169.90 (C, O-

C=O), 131.2 (C), 124.6 (CH), 52.4 (CH<sub>3</sub> and CH), 51.9 (CH<sub>3</sub>, OCH<sub>3</sub>), 36.7 (CH<sub>2</sub>), 34.4 (CH<sub>2</sub>), 32.1 (CH), 26.4 (CH<sub>2</sub>), 25.6 (CH<sub>3</sub>), 25.4 (CH<sub>2</sub>), 19.3 (CH<sub>3</sub>), 17.6 (CH<sub>3</sub>); LCMS: *m/z* 271.00 (M+H<sup>+</sup>), calcd C<sub>15</sub>H<sub>26</sub>O<sub>4</sub> 270.18; Anal. calcd for C<sub>15</sub>H<sub>26</sub>O<sub>4</sub> (270.18): C, 66.64; H, 9.69. Found: C, 66.656; H, 9.680%.

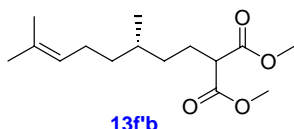

**(+)-2-(3,7-Dimethyl-oct-6-enyl)-malonic acid dimethyl ester**

**(13f'b):** Purified by column chromatography using EtOAc/hexane and isolated as oil.  $[\alpha]_D^{25} = +2.802^\circ$  (*c* = 1.0

g/100 mL, CHCl<sub>3</sub>, 96% ee); IR (neat):  $\nu_{\max}$  2959, 1738 (O-C=O), 1638, 1439, 1270, 1154, 753 and 667 cm<sup>-1</sup>; <sup>1</sup>H NMR (CDCl<sub>3</sub>)  $\delta$  5.06 (1H, br s, C=CH), 3.72 (6H, s, 2 x OCH<sub>3</sub>), 3.31 (1H, t, *J* = 7.2 Hz), 2.00-1.80 (4H, m), 1.66 (3H, s, CH<sub>3</sub>), 1.58 (3H, s, CH<sub>3</sub>), 1.50-1.35 (1H, m), 1.35-1.20 (2H, m), 1.20-1.10 (2H, m), 0.87 (3H, d, *J* = 6.4 Hz, CHCH<sub>3</sub>); <sup>13</sup>C NMR (CDCl<sub>3</sub>, DEPT-135)  $\delta$  169.93 (C, O-C=O), 169.90 (C, O-C=O), 131.2 (C), 124.6 (CH), 52.4 (CH<sub>3</sub> and CH), 51.9 (CH<sub>3</sub>, OCH<sub>3</sub>), 36.7 (CH<sub>2</sub>), 34.4 (CH<sub>2</sub>), 32.1 (CH), 26.4 (CH<sub>2</sub>), 25.7 (CH<sub>3</sub>), 25.4 (CH<sub>2</sub>), 19.3 (CH<sub>3</sub>), 17.6 (CH<sub>3</sub>); LCMS: *m/z* 271.00 (M+H<sup>+</sup>), calcd C<sub>15</sub>H<sub>26</sub>O<sub>4</sub> 270.18; Anal. calcd for C<sub>15</sub>H<sub>26</sub>O<sub>4</sub> (270.18): C, 66.64; H, 9.69. Found: C, 66.517; H, 9.685%.

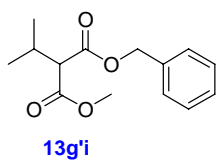

**2-Isopropyl-malonic acid benzyl ester methyl ester (13g'i):**

Purified by column chromatography using EtOAc/hexane and isolated as oil. IR (neat):  $\nu_{\max}$  2964, 1737 (O-C=O), 1731 (O-C=O), 1437,

1272, 1206, 1150, 1022, 751 and 698 cm<sup>-1</sup>; <sup>1</sup>H NMR (CDCl<sub>3</sub>)  $\delta$  7.34-7.32 (5H, m) [Ar-H]; 5.17 (2H, s, CH<sub>2</sub>Ph), 3.69 (3H, s, OCH<sub>3</sub>), 3.20 (1H, d, *J* = 8.4 Hz), 2.44-2.38 (1H, m), 0.99 (3H, d, *J* = 6.4 Hz, CH<sub>3</sub>), 0.98 (3H, d, *J* = 6.0 Hz, CH<sub>3</sub>); <sup>13</sup>C NMR (CDCl<sub>3</sub>, DEPT-135)  $\delta$  169.1 (C, O-C=O), 168.6 (C, O-C=O), 135.5 (C), 128.5 (2 x CH), 128.3 (CH), 128.2 (2 x CH), 66.9 (CH<sub>2</sub>, OCH<sub>2</sub>Ph), 58.9 (CH<sub>3</sub>, OCH<sub>3</sub>), 52.2 (CH), 28.9 (CH), 20.4 (CH<sub>3</sub>), 20.3 (CH<sub>3</sub>); LCMS: *m/z* 251.00 (M+H<sup>+</sup>), calcd C<sub>14</sub>H<sub>18</sub>O<sub>4</sub> 250.29; Anal. calcd for C<sub>14</sub>H<sub>18</sub>O<sub>4</sub> (250.29): C, 67.18; H, 7.25. Found: C, 67.174; H, 7.208%.

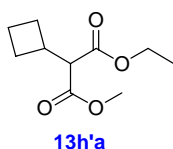

**2-Cyclobutyl-malonic acid ethyl ester methyl ester (13h'a):**

Purified by column chromatography using EtOAc/hexane and isolated as oil. IR (neat):  $\nu_{\max}$  2980, 1736 (O-C=O), 1731 (O-C=O), 1439, 1293, 1245,

1152, 1027, 665 and 632 cm<sup>-1</sup>; <sup>1</sup>H NMR (CDCl<sub>3</sub>)  $\delta$  4.16 (2H, q, *J* = 7.2 Hz, OCH<sub>2</sub>CH<sub>3</sub>), 3.70 (3H, s, OCH<sub>3</sub>), 3.38 (1H, d, *J* = 10.4 Hz), 2.92-2.90 (1H, m), 2.16-

2.10 (2H, m), 1.92-1.78 (4H, m), 1.24 (3H, t,  $J = 7.2$  Hz,  $\text{OCH}_2\text{CH}_3$ );  $^{13}\text{C}$  NMR ( $\text{CDCl}_3$ , DEPT-135)  $\delta$  169.1 (C, O-C=O), 168.5 (C, O-C=O), 61.2 ( $\text{CH}_2$ ,  $\text{OCH}_2\text{CH}_3$ ), 57.7 ( $\text{CH}_3$ ,  $\text{OCH}_3$ ), 52.2 (CH), 34.9 (CH), 27.1 ( $\text{CH}_2$ ), 26.9 ( $\text{CH}_2$ ), 18.3 ( $\text{CH}_2$ ), 14.1 ( $\text{CH}_3$ ,  $\text{OCH}_2\text{CH}_3$ ); LCMS:  $m/z$  201.00 ( $\text{M}+\text{H}^+$ ), calcd  $\text{C}_{10}\text{H}_{16}\text{O}_4$  200.10; Anal. calcd for  $\text{C}_{10}\text{H}_{16}\text{O}_4$  (200.10): C, 59.98; H, 8.05. Found: C, 59.978; H, 8.149%.

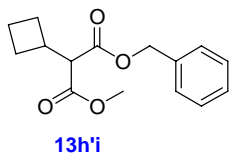

**2-Cyclobutyl-malonic acid benzyl ester methyl ester (13h'i):**

Purified by column chromatography using EtOAc/hexane and isolated as oil. IR (neat):  $\nu_{\text{max}}$  2982, 1736 (O-C=O), 1731 (O-C=O), 1438, 1258, 1149, 1053, 1008, 751 and 698  $\text{cm}^{-1}$ ;  $^1\text{H}$  NMR ( $\text{CDCl}_3$ )

$\delta$  7.36-7.31 (5H, m) [Ar-H]; 5.15 (2H, s,  $\text{OCH}_2\text{Ph}$ ), 3.68 (3H, s,  $\text{OCH}_3$ ), 3.45 (1H, d,  $J = 10.4$  Hz), 2.96-2.91 (1H, m), 2.16-2.10 (2H, m), 1.90-1.80 (4H, m);  $^{13}\text{C}$  NMR ( $\text{CDCl}_3$ , DEPT-135)  $\delta$  168.8 (C, O-C=O), 168.3 (C, O-C=O), 135.5 (C), 128.5 (2 x CH), 128.2 (CH), 128.0 (2 x CH), 66.8 ( $\text{CH}_2$ ,  $\text{OCH}_2\text{Ph}$ ), 57.6 ( $\text{CH}_3$ ,  $\text{OCH}_3$ ), 52.2 (CH), 34.9 (CH), 27.1 ( $\text{CH}_2$ ), 26.9 ( $\text{CH}_2$ ), 18.3 ( $\text{CH}_2$ ); LCMS:  $m/z$  263.00 ( $\text{M}+\text{H}^+$ ), calcd  $\text{C}_{15}\text{H}_{18}\text{O}_4$  262.30; Anal. calcd for  $\text{C}_{15}\text{H}_{18}\text{O}_4$  (262.30): C, 68.68; H, 6.92. Found: C, 68.599; H, 6.996%.

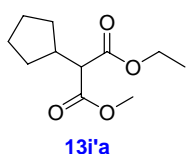

**2-Cyclopentyl-malonic acid ethyl ester methyl ester (13i'a):**

Purified by column chromatography using EtOAc/hexane and isolated as oil. IR (neat):  $\nu_{\text{max}}$  2956, 2869, 1737 (O-C=O), 1731 (O-C=O), 1439, 1368, 1268, 1201, 1148, 1031 and 754  $\text{cm}^{-1}$ ;  $^1\text{H}$  NMR ( $\text{CDCl}_3$ )  $\delta$  4.16 (2H, q,  $J = 7.2$  Hz,  $\text{OCH}_2\text{CH}_3$ ), 3.70 (3H, s,  $\text{OCH}_3$ ), 3.17 (1H, d,  $J = 10.0$  Hz), 2.47-2.45 (1H, m), 1.90-1.78 (2H, m), 1.70-1.50 (4H, m), 1.24 (3H, t,  $J = 7.2$  Hz), 1.30-1.15 (2H, m);  $^{13}\text{C}$

NMR ( $\text{CDCl}_3$ , DEPT-135)  $\delta$  169.5 (C, O-C=O), 169.0 (C, O-C=O), 61.2 ( $\text{CH}_2$ ,  $\text{OCH}_2\text{CH}_3$ ), 57.2 ( $\text{CH}_3$ ,  $\text{OCH}_3$ ), 52.2 (CH), 39.6 (CH), 30.8 ( $\text{CH}_2$ ), 30.6 ( $\text{CH}_2$ ), 24.8 (2 x  $\text{CH}_2$ ), 14.0 ( $\text{CH}_3$ ,  $\text{OCH}_2\text{CH}_3$ ); LCMS:  $m/z$  215.00 ( $\text{M}+\text{H}^+$ ), calcd  $\text{C}_{11}\text{H}_{18}\text{O}_4$  214.28; Anal. calcd for  $\text{C}_{11}\text{H}_{18}\text{O}_4$  (214.28): C, 61.66; H, 8.47. Found: C, 61.700; H, 8.493%.

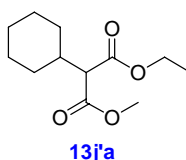

**2-Cyclohexyl-malonic acid ethyl ester methyl ester (13j'a):**

Purified by column chromatography using EtOAc/hexane and isolated as oil. IR (neat):  $\nu_{\text{max}}$  2928, 2854, 1731 (O-C=O), 1275, 1136, 1029 and 754  $\text{cm}^{-1}$ ;  $^1\text{H}$  NMR ( $\text{CDCl}_3$ )  $\delta$  4.17 (2H, dq,  $J = 7.2, 1.2$  Hz,  $\text{OCH}_2\text{CH}_3$ ), 3.71 (3H, s,  $\text{OCH}_3$ ), 3.15 (1H, d,  $J = 9.2$  Hz), 2.09-2.06 (1H, m), 1.73-1.64 (5H, m), 1.30-1.27 (2H, m), 1.26 (3H, t,  $J = 7.2$  Hz), 1.15-1.03 (3H, m);  $^{13}\text{C}$  NMR ( $\text{CDCl}_3$ , DEPT-135)  $\delta$  169.3



(C, O-C=O), 168.7 (C, O-C=O), 61.2 (CH<sub>2</sub>, OCH<sub>2</sub>CH<sub>3</sub>), 58.3 (CH<sub>3</sub>, OCH<sub>3</sub>), 52.2 (CH), 38.0 (CH), 30.8 (CH<sub>2</sub>), 30.7 (CH<sub>2</sub>), 26.0 (CH<sub>2</sub>), 25.9 (2 x CH<sub>2</sub>), 14.1 (CH<sub>3</sub>, OCH<sub>2</sub>CH<sub>3</sub>); LCMS: m/z 229.00 (M+H<sup>+</sup>), calcd C<sub>12</sub>H<sub>20</sub>O<sub>4</sub> 228.28; Anal. calcd for C<sub>12</sub>H<sub>20</sub>O<sub>4</sub> (228.28): C, 63.14; H, 8.83. Found: C, 63.115; H, 8.865%.

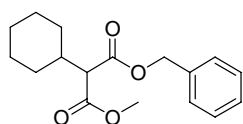

13j'i

**2-Cyclohexyl-malonic acid benzyl ester methyl ester (13j'i):**

Purified by column chromatography using EtOAc/hexane and isolated as oil. IR (neat):  $\nu_{\max}$  3080, 2929, 2853, 1732 (O-C=O), 1275, 1133, 753 and 699 cm<sup>-1</sup>; <sup>1</sup>H NMR (CDCl<sub>3</sub>)  $\delta$  7.38-7.32 (5H, m) [Ar-H]; 5.16 (2H, ABq,  $J = 8.0$  Hz, OCH<sub>2</sub>Ph), 3.69 (3H, s, OCH<sub>3</sub>), 3.23 (1H, d,  $J = 8.8$  Hz), 2.13-2.09 (1H, m), 1.80-1.60 (5H, m), 1.33-1.20 (2H, m), 1.20-0.95 (3H, m); <sup>13</sup>C NMR (CDCl<sub>3</sub>, DEPT-135)  $\delta$  169.0 (C, O-C=O), 168.5 (C, O-C=O), 135.5 (C), 128.5 (2 x CH), 128.2 (CH), 128.1 (2 x CH), 66.8 (CH<sub>2</sub>, OCH<sub>2</sub>Ph), 58.2 (CH<sub>3</sub>, OCH<sub>3</sub>), 52.2 (CH), 38.0 (CH), 30.70 (CH<sub>2</sub>), 30.66 (CH<sub>2</sub>), 25.94 (CH<sub>2</sub>), 25.86 (2 x CH<sub>2</sub>); LCMS: m/z 291.00 (M+H<sup>+</sup>), calcd C<sub>17</sub>H<sub>22</sub>O<sub>4</sub> 290.35; Anal. calcd for C<sub>17</sub>H<sub>22</sub>O<sub>4</sub> (290.35): C, 70.32; H, 7.64. Found: C, 70.305; H, 7.710%.

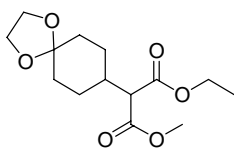

13k'a

**2-(1,4-Dioxa-spiro[4.5]dec-8-yl)-malonic acid ethyl ester methyl ester (13k'a):**

Purified by column chromatography using EtOAc/hexane and isolated as oil. IR (neat):  $\nu_{\max}$  2984, 2950, 2882, 1730 (O-C=O), 1441, 1372, 1272, 1180, 1140, 1102, 1034, 932 and 754 cm<sup>-1</sup>; <sup>1</sup>H NMR (CDCl<sub>3</sub>)  $\delta$  4.20-4.10 (2H, m, OCH<sub>2</sub>CH<sub>3</sub>), 3.90-3.87 (4H, m, OCH<sub>2</sub>CH<sub>2</sub>O), 3.68 (3H, s, OCH<sub>3</sub>), 3.14 (1H, d,  $J = 9.2$  Hz), 2.46 (1H, t,  $J = 6.8$  Hz), 2.15-2.00 (1H, m), 2.00-1.90 (1H, m), 1.75-1.60 (2H, m), 1.52 (2H, dt,  $J = 12.0, 3.2$  Hz), 1.40-1.25 (2H, m), 1.21 (3H, t,  $J = 7.2$  Hz, OCH<sub>2</sub>CH<sub>3</sub>); <sup>13</sup>C NMR (CDCl<sub>3</sub>, DEPT-135)  $\delta$  169.1 (C, O-C=O), 168.5 (C, O-C=O), 108.2 (C), 64.24 (CH<sub>2</sub>, OCH<sub>2</sub>CH<sub>2</sub>O), 64.20 (CH<sub>2</sub>, OCH<sub>2</sub>CH<sub>2</sub>O), 61.3 (CH<sub>2</sub>, OCH<sub>2</sub>CH<sub>3</sub>), 57.2 (CH<sub>3</sub>, OCH<sub>3</sub>), 52.3 (CH), 36.4 (CH), 34.1 (2 x CH<sub>2</sub>), 27.9 (CH<sub>2</sub>), 27.8 (CH<sub>2</sub>), 14.1 (CH<sub>3</sub>, OCH<sub>2</sub>CH<sub>3</sub>); LCMS: m/z 285.00 (M-H<sup>+</sup>), calcd C<sub>14</sub>H<sub>22</sub>O<sub>6</sub> 286.14; Anal. calcd for C<sub>14</sub>H<sub>22</sub>O<sub>6</sub> (286.14): C, 58.73; H, 7.74. Found: C, 58.786; H, 7.785%.

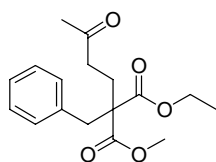

16aaa

**2-Benzyl-2-(3-oxo-butyl)-malonic acid ethyl ester methyl ester (16aaa):**

Purified by column chromatography using EtOAc/hexane and isolated as oil. IR (neat):  $\nu_{\max}$  2953, 1726 (C=O), 1447, 1366, 1266, 1183, 1091,



1030, 745, 703 and 635  $\text{cm}^{-1}$ ;  $^1\text{H NMR}$  ( $\text{CDCl}_3$ )  $\delta$  7.26–7.21 (3H, m), 7.07 (2H, d,  $J = 7.8$  Hz) [Ar-*H*]; 4.16 (2H, q,  $J = 7.0$  Hz,  $\text{OCH}_2\text{CH}_3$ ), 3.70 (3H, s,  $\text{OCH}_3$ ), 3.23 (2H, s,  $\text{CH}_2\text{Ph}$ ), 2.48 (2H, t,  $J = 7.4$  Hz), 2.10 (3H, s,  $\text{CH}_3$ ), 2.07 (2H, t,  $J = 8.2$  Hz), 1.23 (3H, t,  $J = 7.1$  Hz,  $\text{OCH}_2\text{CH}_3$ );  $^{13}\text{C NMR}$  ( $\text{CDCl}_3$ , DEPT-135)  $\delta$  207.0 (C,  $\text{C}=\text{O}$ ), 171.4 (C,  $\text{O}-\text{C}=\text{O}$ ), 170.8 (C,  $\text{O}-\text{C}=\text{O}$ ), 135.6 (C), 129.8 (2 x CH), 128.3 (2 x CH), 127.0 (CH), 61.4 ( $\text{CH}_2$ ,  $\text{OCH}_2\text{CH}_3$ ), 58.1 (C), 52.2 ( $\text{CH}_3$ ,  $\text{OCH}_3$ ), 39.5 ( $\text{CH}_2$ ), 38.8 ( $\text{CH}_2$ ), 29.8 ( $\text{CH}_3$ ), 26.3 ( $\text{CH}_2$ ), 13.9 ( $\text{CH}_3$ ,  $\text{OCH}_2\text{CH}_3$ ); LCMS:  $m/z$  307.00 ( $\text{M}+\text{H}^+$ ), calcd  $\text{C}_{17}\text{H}_{22}\text{O}_5$  306.15; Anal. calcd for  $\text{C}_{17}\text{H}_{22}\text{O}_5$  (306.15): C, 66.65; H, 7.24. Found: C, 66.740; H, 7.210%.

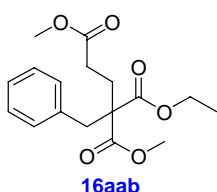

**2-Benzyl-2-ethoxycarbonyl-pentanedioic acid dimethyl ester**

**(16aab):** Purified by column chromatography using EtOAc/hexane and isolated as oil. IR (neat):  $\nu_{\text{max}}$  1721 ( $\text{O}-\text{C}=\text{O}$ ), 1439, 1275, 1266, 1092, 764, 750 and 703  $\text{cm}^{-1}$ ;  $^1\text{H NMR}$  ( $\text{CDCl}_3$ )  $\delta$  7.25–7.20 (3H, m), 7.08–7.06 (2H, m) [Ar-*H*]; 4.16 (2H, q,  $J = 8.0$  Hz,  $\text{OCH}_2\text{CH}_3$ ), 3.69 (3H, s,  $\text{OCH}_3$ ), 3.64 (3H, s,  $\text{OCH}_3$ ), 3.22 (2H, s,  $\text{CH}_2\text{Ph}$ ), 2.36 (2H, t,  $J = 8.0$  Hz), 2.12 (2H, m), 1.21 (3H, t,  $J = 8.0$  Hz,  $\text{OCH}_2\text{CH}_3$ );  $^{13}\text{C NMR}$  ( $\text{CDCl}_3$ , DEPT-135)  $\delta$  173.0 (C,  $\text{O}-\text{C}=\text{O}$ ), 171.2 (C,  $\text{O}-\text{C}=\text{O}$ ), 170.6 (C,  $\text{O}-\text{C}=\text{O}$ ), 135.5 (C), 129.9 (2 x CH), 128.4 (2 x CH), 127.1 (CH), 61.5 ( $\text{CH}_2$ ,  $\text{OCH}_2\text{CH}_3$ ), 58.2 (C), 52.4 ( $\text{CH}_3$ ,  $\text{OCH}_3$ ), 51.7 ( $\text{CH}_3$ ,  $\text{OCH}_3$ ), 39.1 ( $\text{CH}_2$ ), 29.5 ( $\text{CH}_2$ ), 27.5 ( $\text{CH}_2$ ), 14.0 ( $\text{CH}_3$ ,  $\text{OCH}_2\text{CH}_3$ ); LCMS:  $m/z$  323.00 ( $\text{M}+\text{H}^+$ ), calcd  $\text{C}_{17}\text{H}_{22}\text{O}_6$  322.14; Anal. calcd for  $\text{C}_{17}\text{H}_{22}\text{O}_6$  (322.14): C, 63.34; H, 6.88. Found: C, 63.284; H, 6.924%.

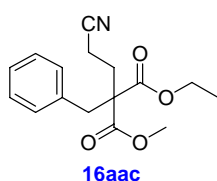

**2-Benzyl-2-(2-cyano-ethyl)-malonic acid ethyl ester methyl ester**

**(16aac):** Purified by column chromatography using EtOAc/hexane and isolated as oil. IR (neat):  $\nu_{\text{max}}$  1727 ( $\text{O}-\text{C}=\text{O}$ ), 1447, 1271, 1201, 1091, 1022, 742 and 704  $\text{cm}^{-1}$ ;  $^1\text{H NMR}$  ( $\text{CDCl}_3$ )  $\delta$  7.27–7.25 (3H, m), 7.05 (2H, d,  $J = 6.8$  Hz) [Ar-*H*]; 4.22 (2H, q,  $J = 7.0$  Hz,  $\text{OCH}_2\text{CH}_3$ ), 3.76 (3H, s,  $\text{OCH}_3$ ), 3.26 (2H, s,  $\text{CH}_2\text{Ph}$ ), 2.43 (2H, t,  $J = 8.1$  Hz), 2.11 (2H, t,  $J = 8.1$  Hz), 1.26 (3H, dt,  $J = 7.1, 2.0$  Hz,  $\text{OCH}_2\text{CH}_3$ );  $^{13}\text{C NMR}$  ( $\text{CDCl}_3$ , DEPT-135)  $\delta$  170.4 (C,  $\text{O}-\text{C}=\text{O}$ ), 169.8 (C,  $\text{O}-\text{C}=\text{O}$ ), 134.7 (C), 129.6 (2 x CH), 128.4 (2 x CH), 127.3 (CH), 118.9 (C, CN), 61.8 ( $\text{CH}_2$ ,  $\text{OCH}_2\text{CH}_3$ ), 57.6 (C), 52.5 ( $\text{CH}_3$ ,  $\text{OCH}_3$ ), 39.5 ( $\text{CH}_2$ ), 28.7 ( $\text{CH}_2$ ), 13.8 ( $\text{CH}_3$ ,  $\text{OCH}_2\text{CH}_3$ ), 13.0 ( $\text{CH}_2$ ); LCMS:  $m/z$  290.00 ( $\text{M}+\text{H}^+$ ), calcd  $\text{C}_{16}\text{H}_{19}\text{NO}_4$  289.13;

Anal. calcd for C<sub>16</sub>H<sub>19</sub>NO<sub>4</sub> (289.13): C, 66.42; H, 6.62; N, 4.84. Found: C, 66.358; H, 6.508; N, 4.815%.

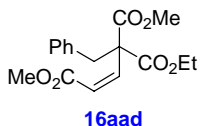

**(Z)-4-Benzyl-4-ethoxycarbonyl-pent-2-enedioic acid dimethyl ester**

**(16aad):** Purified by column chromatography using EtOAc/hexane and isolated as oil. IR (neat):  $\nu_{\max}$  2990, 2954, 1736 (O-C=O), 1730 (O-C=O), 1645, 1440, 1399, 1267, 1179, 1059, 825, 750 and 702 cm<sup>-1</sup>; <sup>1</sup>H NMR (CDCl<sub>3</sub>)  $\delta$  7.25–7.19 (3H, m), 7.05–7.03 (2H, m) [Ar-*H*]; 6.70 (1H, d, *J* = 12.0 Hz), 6.04 (1H, d, *J* = 12.0 Hz), 4.18 (2H, dq, *J* = 8.0, 4.0 Hz, OCH<sub>2</sub>CH<sub>3</sub>), 3.72 (3H, s, OCH<sub>3</sub>), 3.72 (3H, s, OCH<sub>3</sub>), 3.64 (2H, s, CH<sub>2</sub>Ph), 1.21 (3H, t, *J* = 8.0 Hz, OCH<sub>2</sub>CH<sub>3</sub>); <sup>13</sup>C NMR (CDCl<sub>3</sub>, DEPT-135)  $\delta$  169.3 (C, O-C=O), 168.7 (C, O-C=O), 165.8 (C, O-C=O), 144.7 (CH), 135.7 (C), 130.2 (2 x CH), 128.1 (2 x CH), 127.0 (CH), 121.0 (CH), 62.0 (CH<sub>2</sub>, OCH<sub>2</sub>CH<sub>3</sub>), 60.5 (C), 52.8 (CH<sub>3</sub>, OCH<sub>3</sub>), 51.5 (CH<sub>3</sub>, OCH<sub>3</sub>), 41.1 (CH<sub>2</sub>, CH<sub>2</sub>Ph), 13.9 (CH<sub>3</sub>, OCH<sub>2</sub>CH<sub>3</sub>); LCMS: *m/z* 321.00 (M+H<sup>+</sup>), calcd C<sub>17</sub>H<sub>20</sub>O<sub>6</sub> 320.13; Anal. calcd for C<sub>17</sub>H<sub>20</sub>O<sub>6</sub> (320.13): C, 63.74; H, 6.29. Found: C, 63.794; H, 6.109%.

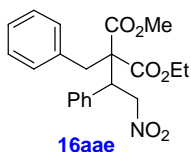

**2-Benzyl-2-(2-nitro-1-phenyl-ethyl)-malonic acid ethyl ester methyl ester**

**(16aae):** Purified by column chromatography using EtOAc/hexane and isolated as solid. MP: 85 °C; The enantiomeric excess (ee) was determined by chiral stationary phase HPLC using a Daicel Chiralcel OJ-H column (hexane/*i*-PrOH = 90:10, flow rate 1.0 mL/min,  $\lambda$  = 254 nm), *t*<sub>R</sub> = 11.50 min (minor), *t*<sub>R</sub> = 13.22 min (major) [one of the diastereomer]; *t*<sub>R</sub> = 18.00 min (minor), *t*<sub>R</sub> = 24.36 min (major) [second diastereomer]; IR (neat):  $\nu_{\max}$  1727 (O-C=O), 1551, 1268, 1199, 753 and 704 cm<sup>-1</sup>; <sup>1</sup>H NMR (CDCl<sub>3</sub>, 1:1 mixture of two diastereomers)  $\delta$  7.50–7.00 (20H, m, Ar-*H*); 5.00–4.89 (4H, m, 2 x CH<sub>2</sub>NO<sub>2</sub>), 4.32–4.26 (4H, m, 2 x OCH<sub>2</sub>CH<sub>3</sub>), 4.15–4.05 (1H, m), 3.95–3.90 (1H, m), 3.82 (3H, s, OCH<sub>3</sub>), 3.56 (3H, s, OCH<sub>3</sub>), 3.21 (2H, dd, *J* = 14.4, 2.4 Hz, CH<sub>2</sub>Ph), 2.89 (2H, dd, *J* = 14.4, 6.4 Hz, CH<sub>2</sub>Ph), 1.30 (3H, t, *J* = 7.2 Hz, OCH<sub>2</sub>CH<sub>3</sub>), 1.04 (3H, t, *J* = 7.2 Hz, OCH<sub>2</sub>CH<sub>3</sub>); <sup>13</sup>C NMR (CDCl<sub>3</sub>, DEPT-135, 1:1 mixture of two diastereomers)  $\delta$  170.2 (C, O-C=O), 170.1 (C, O-C=O), 169.6 (C, O-C=O), 169.5 (C, O-C=O), 135.58 (C), 135.55 (C), 135.1 (C), 135.0 (C), 130.2 (2 x CH), 130.1 (2 x CH), 129.2 (2 x CH), 129.1 (2 x CH), 128.9 (2 x CH), 128.8 (2 x CH), 128.6 (2 x CH), 128.18 (2 x CH), 128.16 (2 x CH), 127.3 (CH), 127.2 (CH), 78.7 (2 x CH<sub>2</sub>, 2 x CH<sub>2</sub>NO<sub>2</sub>), 62.23 (2 x C), 62.08 (CH<sub>2</sub>, OCH<sub>2</sub>CH<sub>3</sub>), 61.9 (CH<sub>2</sub>, OCH<sub>2</sub>CH<sub>3</sub>), 52.6 (CH<sub>3</sub>,

OCH<sub>3</sub>), 52.5 (CH<sub>3</sub>, OCH<sub>3</sub>), 48.4 (CH), 48.3 (CH), 40.6 (CH<sub>2</sub>, CH<sub>2</sub>Ph), 40.4 (CH<sub>2</sub>, CH<sub>2</sub>Ph), 13.9 (CH<sub>3</sub>, OCH<sub>2</sub>CH<sub>3</sub>), 13.6 (CH<sub>3</sub>, OCH<sub>2</sub>CH<sub>3</sub>); LCMS: m/z 386.00 (M+H<sup>+</sup>), calcd C<sub>21</sub>H<sub>23</sub>NO<sub>6</sub> 385.15; Anal. calcd for C<sub>21</sub>H<sub>23</sub>NO<sub>6</sub> (385.15): C, 65.44; H, 6.02; N, 3.63. Found: C, 65.461; H, 6.027; N, 3.703%.

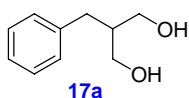

**2-Benzyl-propane-1,3-diol (17a):** Purified by column chromatography using EtOAc/hexane and isolated as oil. IR (neat):  $\nu_{\max}$  3342 (O-H), 3027, 2937, 2886, 1494, 1448, 1271, 1099, 1033, 969, 747, 701, 664 and 637 cm<sup>-1</sup>; <sup>1</sup>H NMR (CDCl<sub>3</sub>)  $\delta$  7.28 (2H, t,  $J$  = 7.2 Hz), 7.21-7.16 (3H, m) [Ar-*H*]; 3.74 (2H, dd,  $J$  = 10.8, 4.0 Hz), 3.61 (2H, dd,  $J$  = 10.8, 7.2 Hz), 3.28 (2H, br s, 2 x OH), 2.58 (2H, d,  $J$  = 7.6 Hz, CH<sub>2</sub>Ph), 2.00 (1H, m); <sup>13</sup>C NMR (CDCl<sub>3</sub>, DEPT-135)  $\delta$  140.0 (C), 129.0 (2 x CH), 128.3 (2 x CH), 126.0 (CH), 64.81 (CH<sub>2</sub>), 64.80 (CH<sub>2</sub>), 43.8 (CH), 34.2 (CH<sub>2</sub>, CH<sub>2</sub>Ph); LCMS: m/z 167.00 (M+H<sup>+</sup>), calcd C<sub>10</sub>H<sub>14</sub>O<sub>2</sub> 166.10; Anal. calcd for C<sub>10</sub>H<sub>14</sub>O<sub>2</sub> (166.10): C, 72.26; H, 8.49. Found: C, 72.370; H, 8.598%.

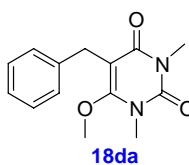

**5-Benzyl-6-methoxy-1,3-dimethyl-1H-pyrimidine-2,4-dione (18da):** Purified by column chromatography using EtOAc/hexane and isolated as oil. IR (neat):  $\nu_{\max}$  2953, 1700 (C=O), 1641 (C=O), 1633, 1447, 1264, 1222, 1138, 752 and 702 cm<sup>-1</sup>; <sup>1</sup>H NMR (CDCl<sub>3</sub>)  $\delta$  7.28-7.16 (5H, m) [Ar-*H*]; 3.78 (3H, s, OCH<sub>3</sub>), 3.76 (2H, s, CH<sub>2</sub>Ph), 3.36 (3H, s, N-CH<sub>3</sub>), 3.34 (3H, s, N-CH<sub>3</sub>); <sup>13</sup>C NMR (CDCl<sub>3</sub>, DEPT-135)  $\delta$  164.2 (C), 159.0 (C), 151.3 (C), 140.1 (C), 128.3 (2 x CH), 128.1 (2 x CH), 126.1 (CH), 100.6 (C), 61.8 (CH<sub>3</sub>, OCH<sub>3</sub>), 29.6 (CH<sub>3</sub>, N-CH<sub>3</sub>), 29.1 (CH<sub>2</sub>, CH<sub>2</sub>Ph), 28.4 (CH<sub>3</sub>, N-CH<sub>3</sub>); LCMS: m/z 260.00 (M<sup>+</sup>), calcd C<sub>14</sub>H<sub>16</sub>N<sub>2</sub>O<sub>3</sub> 260.12; Anal. calcd for C<sub>14</sub>H<sub>16</sub>N<sub>2</sub>O<sub>3</sub> (260.12): C, 64.60; H, 6.20; N, 10.76. Found: C, 64.487; H, 6.184; N, 10.804%.

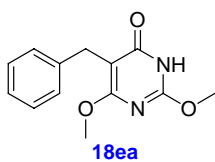

**5-Benzyl-2,6-dimethoxy-3H-pyrimidin-4-one (18ea):** Purified by column chromatography using EtOAc/hexane and isolated as solid. MP: 198 °C; IR (neat):  $\nu_{\max}$  2858, 1718, 1638 (C=O), 1633 (C=O), 1577, 1458, 1378, 1329, 1289, 1112, 747, 704 and 634 cm<sup>-1</sup>; <sup>1</sup>H NMR (CDCl<sub>3</sub>)  $\delta$  7.34 (2H, d,  $J$  = 7.2 Hz), 7.23 (2H, t,  $J$  = 7.6 Hz), 7.14 (1H, t,  $J$  = 6.8 Hz) [Ar-*H*]; 3.96 (3H, s, OCH<sub>3</sub>), 3.92 (3H, s, OCH<sub>3</sub>), 3.76 (2H, s, CH<sub>2</sub>Ph); <sup>13</sup>C NMR (CDCl<sub>3</sub>, DEPT-135)  $\delta$  167.5 (C), 166.7 (C), 156.0 (C), 141.3 (C), 128.5 (2 x CH), 128.0 (2 x CH), 125.5 (CH), 97.8 (C), 54.7 (CH<sub>3</sub>, OCH<sub>3</sub>), 54.2 (CH<sub>3</sub>, OCH<sub>3</sub>), 21.7 (CH<sub>2</sub>, CH<sub>2</sub>Ph); LCMS:

$m/z$  245.00 ( $M-H^+$ ), calcd  $C_{13}H_{14}N_2O_3$  246.10; Anal. calcd for  $C_{13}H_{14}N_2O_3$  (246.10): C, 63.40; H, 5.73; N, 11.38. Found: C, 63.371; H, 5.717; N, 11.309%.

**5-Benzyl-2,6-dimethoxy-3-methyl-3H-pyrimidin-4-one (19ea):** Purified by column

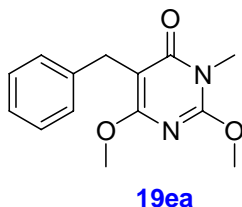

chromatography using EtOAc/hexane and isolated as mixture with the compound **18ea**.  $^1H$  NMR ( $CDCl_3$ )  $\delta$  7.36-7.32 (2H, m), 7.23

(2H, d,  $J = 7.6$  Hz), 7.15-7.12 (1H, m) [Ar- $H$ ]; 4.00 (3H, s,  $OCH_3$ ), 3.92 (3H, s,  $OCH_3$ ), 3.75 (2H, s,  $CH_2Ph$ ), 3.38 (3H, s,  $N-CH_3$ );  $^{13}C$

NMR ( $CDCl_3$ , DEPT-135)  $\delta$  164.6 (C,  $C=O$ ), 164.1 (C), 155.9 (C), 141.5 (C), 128.6 (2 x CH), 128.1 (2 x CH), 125.6 (CH), 97.7 (C), 55.3 ( $CH_3$ ,  $OCH_3$ ), 53.9 ( $CH_3$ ,  $OCH_3$ ), 28.7 ( $CH_2$ ,  $CH_2Ph$ ), 28.0 ( $CH_3$ ,  $N-CH_3$ ).

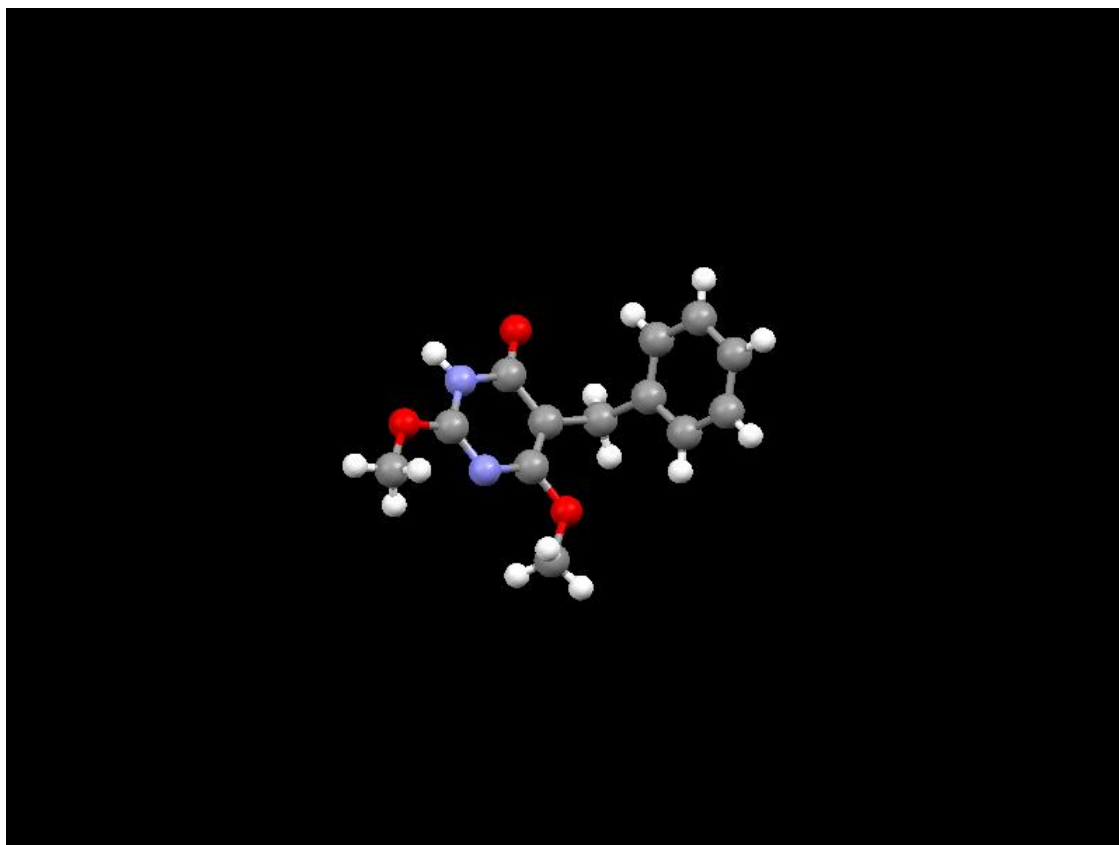

**Figure S1.** Crystal structure of 5-benzyl-2,6-dimethoxy-3H-pyrimidin-4-one (**18ea**).

## Data-block: dbr59 (Compound-18ea)

---

Bond precision: C-C = 0.0028 Å Wavelength=0.71073  
Cell: a=12.482(9) b=13.018(10) c=8.140(6)  
alpha=90 beta=107.639(12) gamma=90

Temperature: 298 K

|                        | Calculated    | Reported      |
|------------------------|---------------|---------------|
| Volume                 | 1260.5(16)    | 1260.5(16)    |
| Space group            | P 21/c        | P2(1)/c       |
| Hall group             | -P 2ybc       | ?             |
| Moiety formula         | C13 H14 N2 O3 | ?             |
| Sum formula            | C13 H14 N2 O3 | C13 H14 N2 O3 |
| Mr                     | 246.26        | 246.10        |
| Dx, g cm <sup>-3</sup> | 1.298         | 1.297         |
| Z                      | 4             | 4             |
| Mu (mm <sup>-1</sup> ) | 0.094         | 0.094         |
| F000                   | 520.0         | 550.0         |
| F000'                  | 520.25        |               |
| h, k, lmax             | 15, 16, 10    | 15, 16, 10    |
| Nref                   | 2492          | 2481          |
| Tmin, Tmax             | 0.961, 0.993  |               |
| Tmin'                  | 0.961         |               |

Correction method= Not given

Data completeness= Ratio = Theta(max)= 26.060  
0.996

R(reflections)= 0.0447( 1829) wR2(reflections)= 0.1203( 2481)

S = 1.036 Npar= 169

---

**PLATON version of 12/11/2008; check.def file version of 12/11/2008**

**Datablock dbr59 - ellipsoid plot**

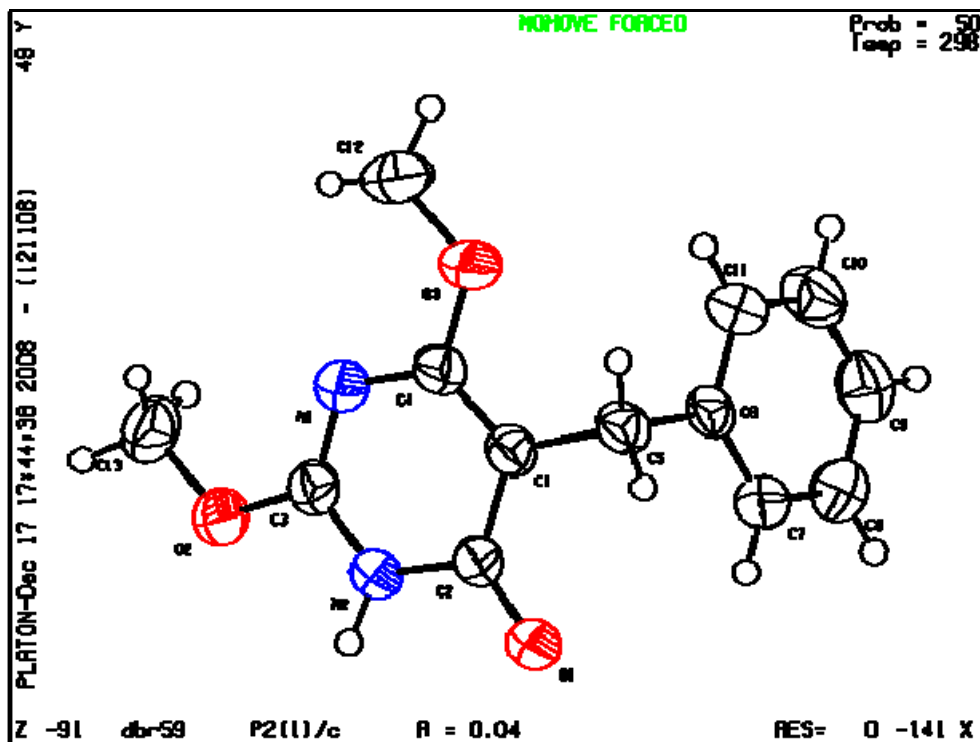

Supplement: b901652j-1.pdf [file b901652j-1.pdf]
